# Supplementary material for: Selective Mitochondrial Protein Labeling Enabled by Biocompatible Photocatalytic Reactions inside Live Cells
Source: PubMed Central journal article supplement — JACS Au. 2021 Jun 14;1(7):1066–75. doi: 10.1021/jacsau.1c00172 (PMC8395695; doi:10.1021/jacsau.1c00172), 2021-06-14
Supplement: au1c00172_si_001.pdf [file au1c00172_si_001.pdf]

# Selective Mitochondrial Proteins Labeling Enabled by Biocompatible Photocatalytic Reactions inside Live Cells

## Supporting Information

Haoyan Wang<sup>1#</sup>, Yixin Zhang<sup>1#</sup>, Kaixing Zeng<sup>1,2#</sup>, Jiali Qiang<sup>3#</sup>, Ye Cao<sup>3</sup>, Yunxia Li<sup>3</sup>,  
Yanshan Fang<sup>3</sup>, Yaoyang Zhang<sup>3\*</sup>, and Yiyun Chen<sup>1,2,4\*</sup>

<sup>1</sup>State Key Laboratory of Bioorganic and Natural Products Chemistry, Center for Excellence in Molecular Synthesis, Shanghai Institute of Organic Chemistry, University of Chinese Academy of Sciences, Chinese Academy of Sciences, 345 Lingling Road, Shanghai 200032 China. <sup>2</sup>School of Physical Science and Technology, ShanghaiTech University, 100 Haik Road, Shanghai 201210 China. <sup>3</sup>Interdisciplinary Research Center on Biology and Chemistry, Shanghai Institute of Organic Chemistry, Chinese Academy of Sciences, 26 Qiuyue Rd., Pudong, Shanghai, 201210, China. <sup>4</sup>School of Chemistry and Material Sciences, Hangzhou Institute for Advanced Study, University of Chinese Academy of Sciences, 1 Sub-lane Xiangshan, Hangzhou 310024, China

\*Professor Yaoyang Zhang  
zyy@sioc.ac.cn

\*Professor Yiyun Chen  
yiyunchen@sioc.ac.cn  
<http://yiyunchen.sioc.ac.cn>

## Table of Contents

|                                                       |    |
|-------------------------------------------------------|----|
| I. Mechanistic Studies .....                          | 2  |
| II. Protein Photolabeling <i>in Vitro</i> .....       | 14 |
| III. Mammalian Cell Studies .....                     | 20 |
| IV. Protein and peptide analysis by LC-MS/MS .....    | 33 |
| V. Substrate Preparations and Characterizations ..... | 50 |
| VI. NMR Spectra of New Compounds .....                | 59 |
| VII. References .....                                 | 65 |

## I. Mechanistic Studies

### The photocatalytic decomposition of aryl azide

Reactions were conducted in 5 mL clear-colored glass vials equipped with a magnetic stir bar at ambient temperature. 4-azidobenzoic acid **4** (200  $\mu\text{M}$ , 50 mM stock solution in DMSO) and organic dyes (50  $\mu\text{M}$ , 50 mM stock solution in DMSO) were mixed in 2.0 mL PBS buffer (10 mM, pH 7.4) and irradiated with visible light for 1 h. The reactions were carried out with a smart xenon lamp light source CEL-HXF300E/HXUV300E (*CEAULIGHT*) equipped with band-pass filters (15 cm from the Xe lamp, 19.8  $\text{mW cm}^{-2}$ ). The light intensity was measured with an FZ-A photometer (*BNU Photoelectric Instrument*). After the reaction, a sample of the mixture (50  $\mu\text{L}$ ) was directly subjected to HPLC analysis to afford the conversions. HPLC experiments were performed on a Dionex Ultimate 3000 HPLC system (*ThermoFisher scientific*) using a C18 column (250  $\times$  4.6 mm internal diameter, particle size 5  $\mu\text{m}$ ).

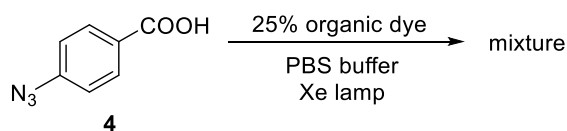

| entry | organic dye     | light  | $\lambda_{\max}$ | $E_T$ (eV) | $E_{1/2}(\text{red})$ | conversion (in air) | conversion (in N <sub>2</sub> ) |
|-------|-----------------|--------|------------------|------------|-----------------------|---------------------|---------------------------------|
| 1     | blank           | 500 nm |                  |            |                       | <5%                 | <5%                             |
| 2     | Acridine Orange | 500 nm | 495 nm           | 2.13       | -0.92 V               | 40%                 | 70%                             |
| 3     | Fluorescein     | 500 nm | 491 nm           | 1.94       | -1.22 V               | 28%                 | 33%                             |
| 4     | Rhodamine 123   | 500 nm | 505 nm           | 1.90       | -0.89 V               | 54%                 | 50%                             |
| 5     | Rhodamine B     | 550 nm | 550 nm           | 1.80       | -0.96 V               | <5%                 | <5%                             |
| 6     | TMRE            | 550 nm | 550 nm           | ~1.80      | ~ -0.96 V             | <5%                 | 6%                              |

**Table S1.** The photocatalytic decomposition of 4-azidobenzoic acid **4** with different organic dyes. Conversions were given by the area changes of **4** (retention time 10.8 min, 210 nm) showed in HPLC. HPLC gradient: 5% to 75% acetonitrile (0-15 min) in phosphate buffer (20 mM, pH 4.0). The wavelengths of the maximum absorption ( $\lambda_{\max}$ ), triplet energies ( $E_T$ ), and part of ground state reductant potentials ( $E_{1/2}(\text{red})$ ) of the organic dyes were adapted from literatures.<sup>1-2</sup> Measured ground state redox potentials ( $E_{1/2}(\text{red})$ ) were shown in Figure S1. The  $E_T$  and  $E_{1/2}(\text{red})$  of TMRE were estimated by those of Rhodamine B. Parts of the results were also shown in Figure 3b.

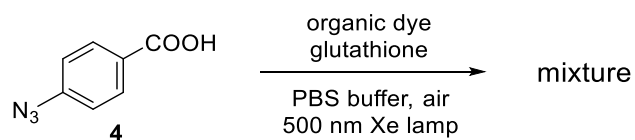

| entry | organic dye     | glutathione | conversion |
|-------|-----------------|-------------|------------|
| 1     | Acridine Orange | 0.2 mM      | 16%        |
| 2     | Acridine Orange | 1 mM        | 12%        |
| 3     | Acridine Orange | 5 mM        | 11%        |
| 4     | Rhodamine 123   | 0.2 mM      | 25%        |
| 5     | Rhodamine 123   | 1 mM        | 23%        |
| 6     | Rhodamine 123   | 5 mM        | 16%        |
| 7     | Fluorescein     | 0.2 mM      | 24%        |
| 8     | Fluorescein     | 1 mM        | 34%        |
| 9     | Fluorescein     | 5 mM        | 36%        |

**Table S2.** The photocatalytic decomposition of 4-azidobenzoic acid **4** in the presence of glutathione. HPLC conditions were identical to those shown in Table S1.

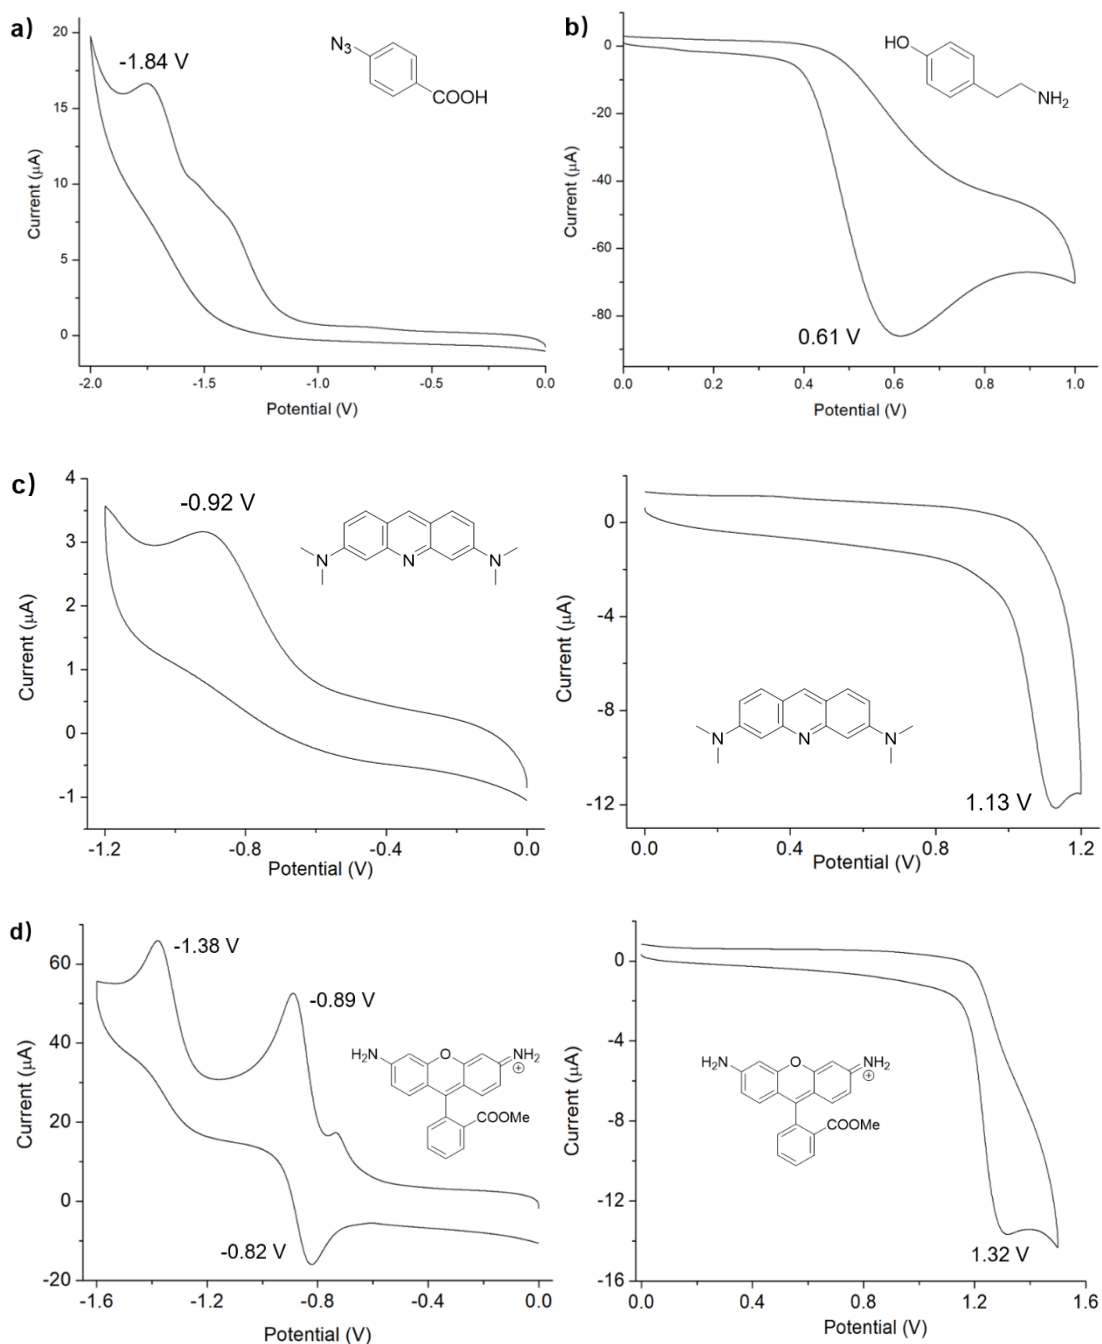

**Figure S1.** Cyclic voltammogram of the representative compounds and organic dyes Acridine Orange (AO) and Rhodamine 123 (Rh 123). Experiments were performed with a CH Electrochemical Analyzer (*CH Instruments, Inc.*) at room temperature under a nitrogen atmosphere. A solution of 1 mM sample in methanol containing 100 mM tetrabutylammonium hexafluorophosphate (TBAP) as the supporting electrolyte was measured with a three-electrode system: a glassy carbon working electrode, a Pt wire counter electrode, and a saturated calomel reference electrode. The scan rate was set as 0.1 V/s.

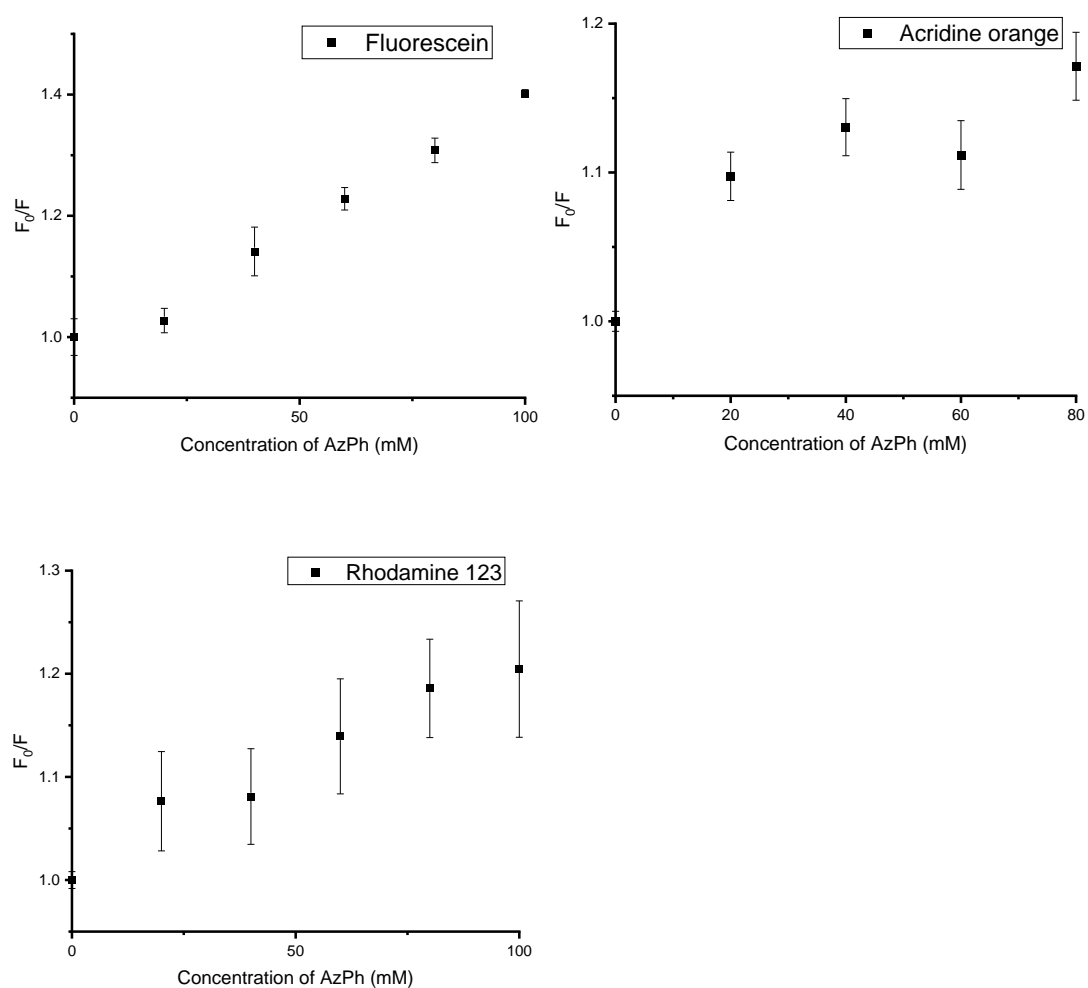

**Figure S2.** Fluorescence quenching of organic dyes with different concentrations of AzPh **5** (Stern-Volmer analysis).  $F_0$  and  $F$  were emission intensity in the absence and presence of quencher in Stern-Volmer equation ( $F_0/F = 1 + k[Q]$ , where  $k$  was the slope and  $[Q]$  was the concentration of quencher) respectively. The methanol solution of organic dye (20  $\mu\text{M}$ ) was mixed with methyl 4-azidobenzoate **5** under the nitrogen atmosphere, and was added to a 1 cm quartz cuvette. The emission spectra of samples were collected with a HITACHI F-2700 FL Spectrophotometer. The excitation wavelength (Ex) and the wavelength in emission spectra used for calculation (Em) were shown as following: Fluorescein Ex = 490 nm, Em = 519 nm; Acridine Orange Ex = 495 nm, Em = 526 nm; Rhodamine 123 Ex = 500 nm, Em = 536 nm. Error bars represented mean  $\pm$  SD ( $n = 3$ ).

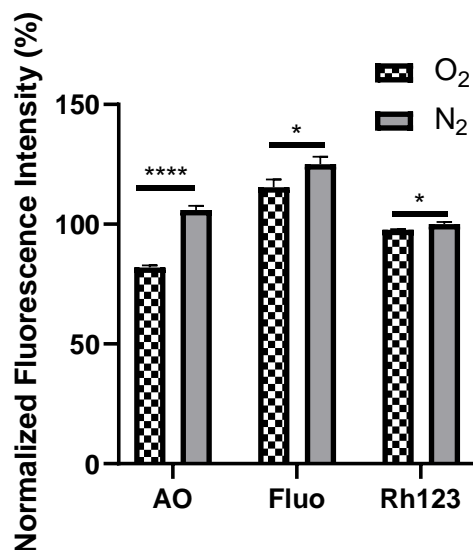

**Figure S3.** Effect of oxygen on the fluorescence of organic dyes. Fluorescence intensity measured under air atmosphere in each group was set as the 100% standard respectively. Error bars represented mean  $\pm$  SD (n = 3). The statistical significance of the differences between groups was evaluated with the unpaired Student's t-test. P value of 0.05 and below was considered significant:  $p < 0.05$  (\*) and  $p < 0.0001$  (\*\*\*\*).

### Determination of singlet oxygen quantum yields ( $\Phi_{\Delta}$ ) of organic dyes

According to the previous literature,<sup>3</sup> singlet oxygen generation by organic dyes involved two main reaction pathways with the quencher A.

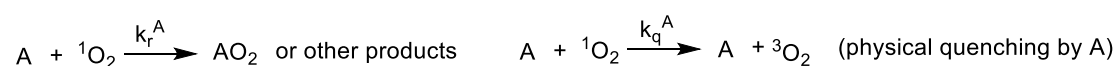

The rate of disappearance of a specific chemical quencher A obeys Supplementary equation (1)

$$-\frac{d[A]}{dt} = I_{abs} \Phi_{\Delta} \frac{k_r^A}{k_d} [A] \quad (1)$$

After integration, equation (1) was transformed to Supplementary equation (2)

$$\ln \frac{[A]}{[A]_0} = -I_{abs} \Phi_{\Delta} \frac{k_r^A}{k_d} t \quad (2)$$

$k_d$  is the constant of deactivation of the singlet oxygen via the solvent,  $k_r$  is the rate constant of quenching of singlet oxygen by quencher A, and  $I_{abs}$  is intensity of light absorbed by solution.

ADPA is water soluble and used as the chemical quencher of singlet oxygen for determination of the singlet oxygen quantum yields<sup>4</sup>. ADPA (100  $\mu$ M, 100 mM stock solution in DMSO) and organic dyes (10  $\mu$ M, 50 mM stock solution in DMSO) were mixed in 1.0 mL PBS buffer (10 mM, pH 7.4 or 2.0). The solution was placed in a cuvette and irradiated for different time at  $\lambda = 500$  nm (a smart xenon lamp light source, 19.8 mW /cm<sup>2</sup>) under air. The absorbance of the solution was measured at 400 nm. By taking the logarithm of the ratio of the absorption value at each time to the initial absorption value as the ordinate, and time is the abscissa, we fit each point to get the slope (slope =  $-I_{\text{abs}} \Phi_{\Delta} \frac{k_f^A}{k_d}$ ).  $f$  is the fraction of light absorbed at  $\lambda = 500$  nm (equation (4)). The absorbance (A) of organic dyes solution (10  $\mu$ M) at 500 nm was measured. By taking Rose Bengal ( $\Phi_{\Delta\text{stan}} = 0.76$ ) as the standard<sup>5</sup>, the singlet oxygen quantum yields was calculated using equation (3), slope<sub>meas</sub> and  $f_{\text{meas}}$  belonged to the organic dyes to be tested while slope<sub>stan</sub> and  $f_{\text{stan}}$  was obtained from Rose Bengal.

$$\Phi_{\Delta\text{cal}} = \frac{\text{slope}_{\text{meas}} f_{\text{stan}} \Phi_{\Delta\text{ref}}}{\text{slope}_{\text{stan}} f_{\text{meas}}} \quad (3)$$

$$f = 1 - 10^{-A} \quad (4)$$

The singlet oxygen quantum yields of Eosin Y, Fluorescein, Rhodamine 123 and Acridine orange were determined. The singlet oxygen quantum yield of Eosin Y was 0.56, this was in good agreement with that determined by Van de Vorst et al. ( $\Phi_{\Delta} = 0.57$ )

4



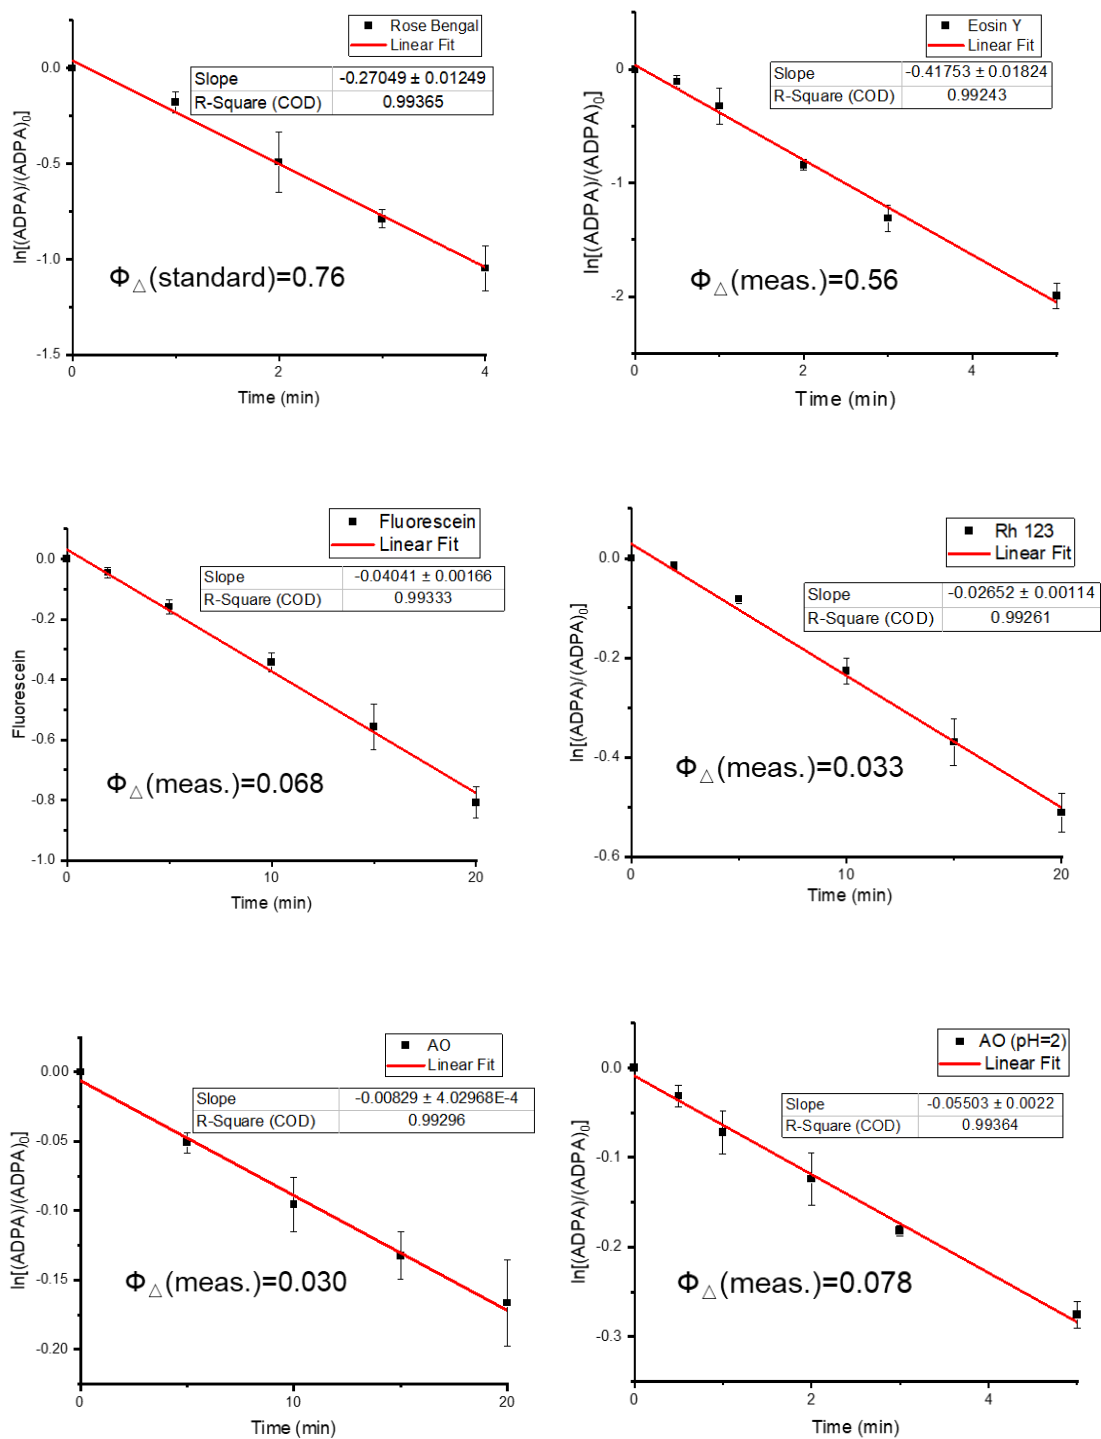

**Figure S4.** Plots used to calculate singlet oxygen quantum yields of organic dyes in the neutral or acidic buffer solutions (AO, pH = 2). Error bars represented mean  $\pm$  SD (n = 3).

### Time-course of the photocatalytic decomposition of AzPh-biotin probe 1

To evaluate the time course of the photocatalytic decomposition, organic dyes (100  $\mu\text{M}$ , 10 mM stock solution in DMSO) was added to a solution of AzPh-biotin probe 1 with or without BSA in the PBS buffer (10 mM, pH 7.4) and irradiated with blue or green LED for 0, 2, 5, 10, 20, 30, 60 min. The solutions were then subjected to HPLC analysis to afford the conversions. HPLC experiments were performed on a Dionex Ultimate 3000 HPLC system (*ThermoFisher scientific*) using a C18 column (250  $\times$  4.6 mm internal diameter, particle size 5  $\mu\text{m}$ ).

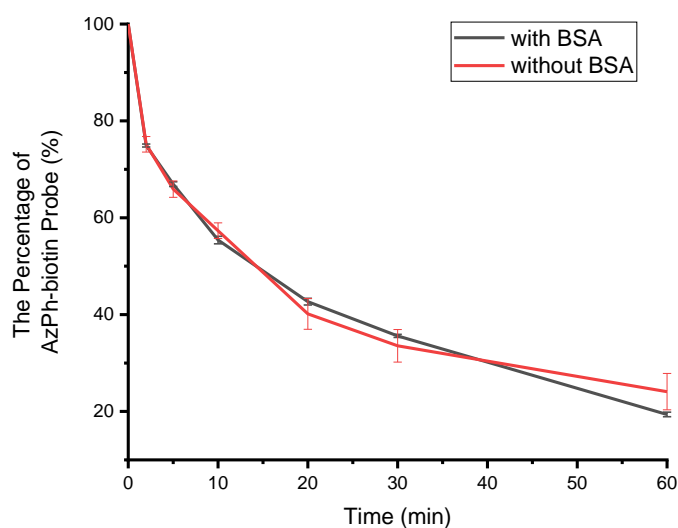

**Figure S5.** Kinetic study for conversion of AzPh-biotin probe 1 (100  $\mu\text{M}$ ) with fluorescein (100  $\mu\text{M}$ ) using 468 nm (5.8  $\text{mW}/\text{cm}^2$ ) LED light in the air atmosphere with or without BSA (2  $\mu\text{M}$ ). First-order rate constant was  $0.0279 \text{ min}^{-1}$ ,  $t_{1/2}=24.8 \text{ min}$ . Error bars represented mean  $\pm$  SD ( $n = 3$ ).

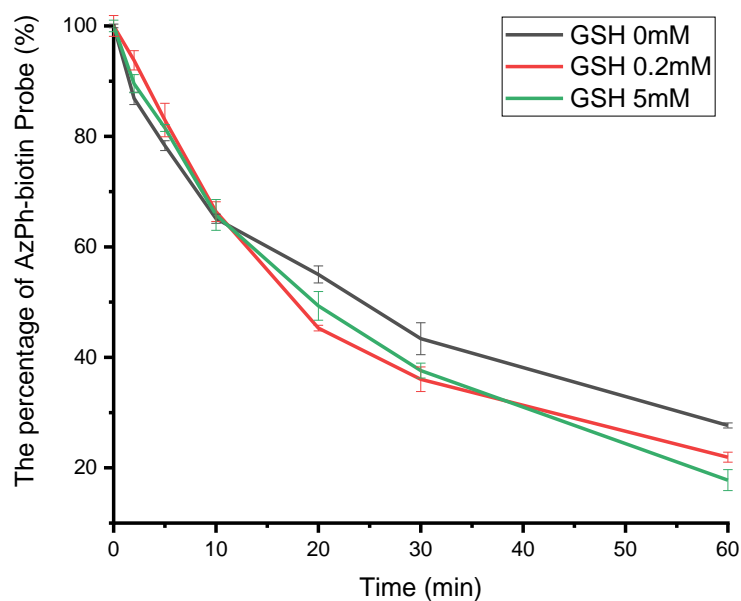

**Figure S6.** Kinetic study for conversion of AzPh-biotin probe **1** (100  $\mu\text{M}$ ) with fluorescein (100  $\mu\text{M}$ ) using 468 nm (5.8  $\text{mW}/\text{cm}^2$ ) LED light in the air atmosphere in the presence of GSH at different concentrations (0, 0.2, 5mM, respectively). Error bars represented mean  $\pm$  SD ( $n = 3$ ).

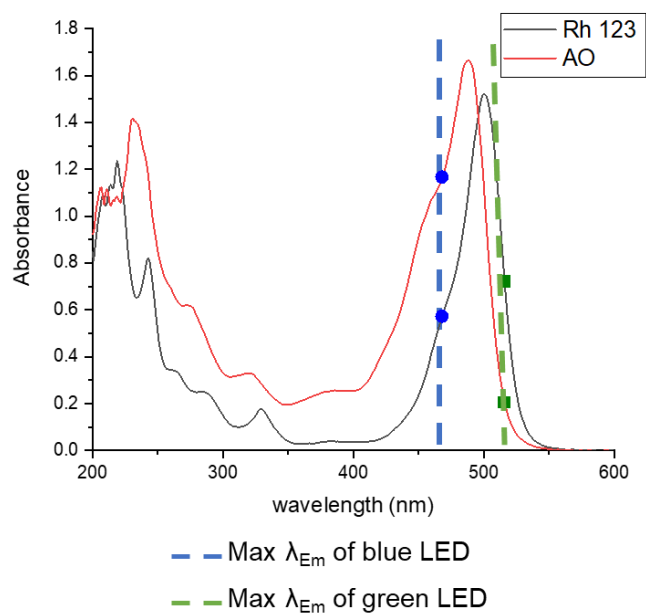

**Figure S7.** Absorption spectra of Acridine orange (25  $\mu\text{M}$ ) and Rhodamine 123 (25  $\mu\text{M}$ ) and maximum emission wavelength of blue LED (468 nm) and green LED (515 nm).

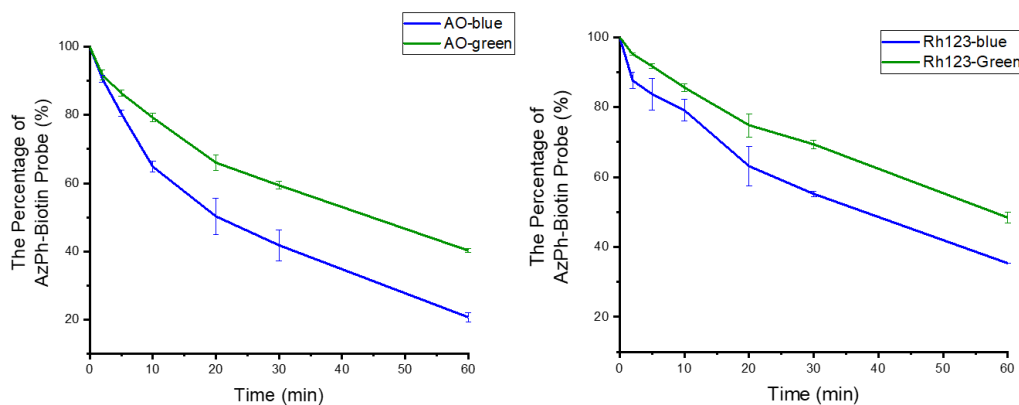

**Figure S8.** Kinetic study for AzPh-biotin probe **1** (100  $\mu\text{M}$ ) with organic dyes (100  $\mu\text{M}$ ) using 468 nm blue LED light (5.8  $\text{mW}/\text{cm}^2$ ) or 515 nm green LED light (2.9  $\text{mW}/\text{cm}^2$ ). Error bars represented mean  $\pm$  SD ( $n = 3$ ). In the presence of AO, first-order rate constants of blue and green light group were 0.025 and 0.014  $\text{min}^{-1}$ , respectively. In the presence of Rh 123, first-order rate constant of blue and green light group were 0.016 and 0.012  $\text{min}^{-1}$ , respectively.

#### **Time-course of capturing photocatalytic reaction intermediates by amines**

A solution of **5** (18 mg, 0.10 mmol) and Acridine Orange (6.6 mg, 0.020 mmol) in methanol (2.0 mL) was placed in a 5.0 mL clear-colored glass vial equipped with a magnetic stir bar. After the addition of 1.0 mL diethylamine **13**, the reaction was bubbled with nitrogen gas to remove the oxygen. The vial was then sealed and exposed to  $2 \times 4\text{W}$  468 nm blue LEDs (10.0 cm from the LEDs, 10.4  $\text{mW}/\text{cm}^2$ ) with stirring at ambient temperature for 1, 3, 6, 12, 24, 48 hours. After irradiation, the conversion and yields were determined by  $^1\text{H}$  NMR using *p*-nitrobenzyl alcohol as an external standard or HPLC using standard curve.

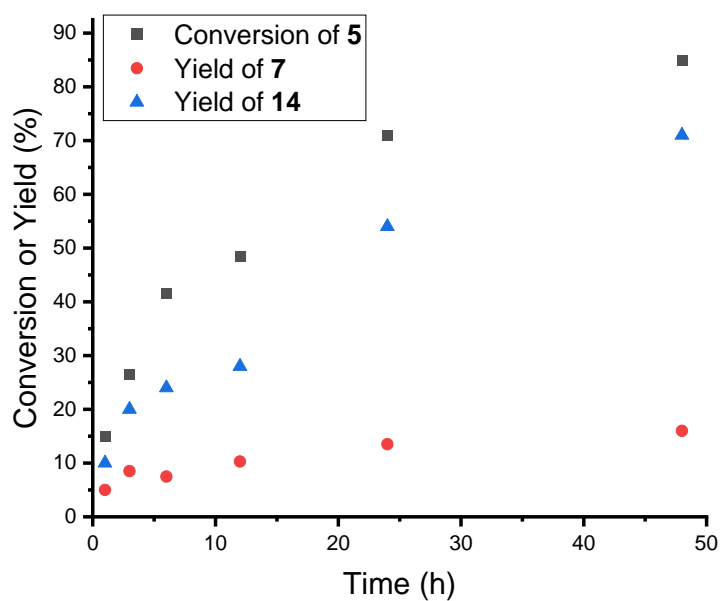

**Figure S9.** Kinetic study for conversion of compound **5** to **7** and **14** after adding diethylamine **13** under  $2 \times 4\text{W } 468\text{ nm}$  blue LEDs ( $10.4\text{ mW/cm}^2$ ) irradiation at room temperature in methanol. Conversions of **5** and and yields of **7** and **14** were determined by  $^1\text{H NMR}$  analysis.

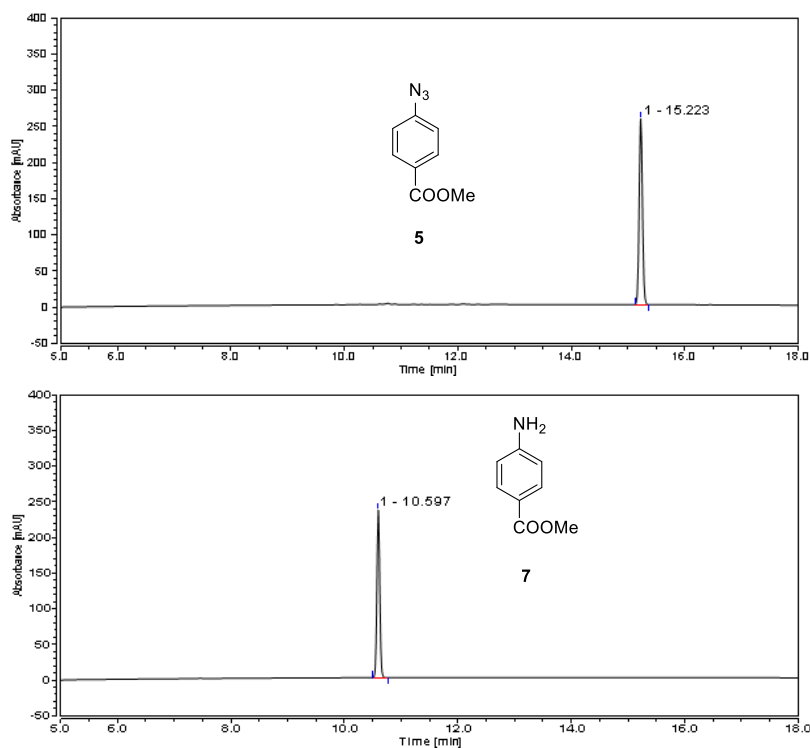

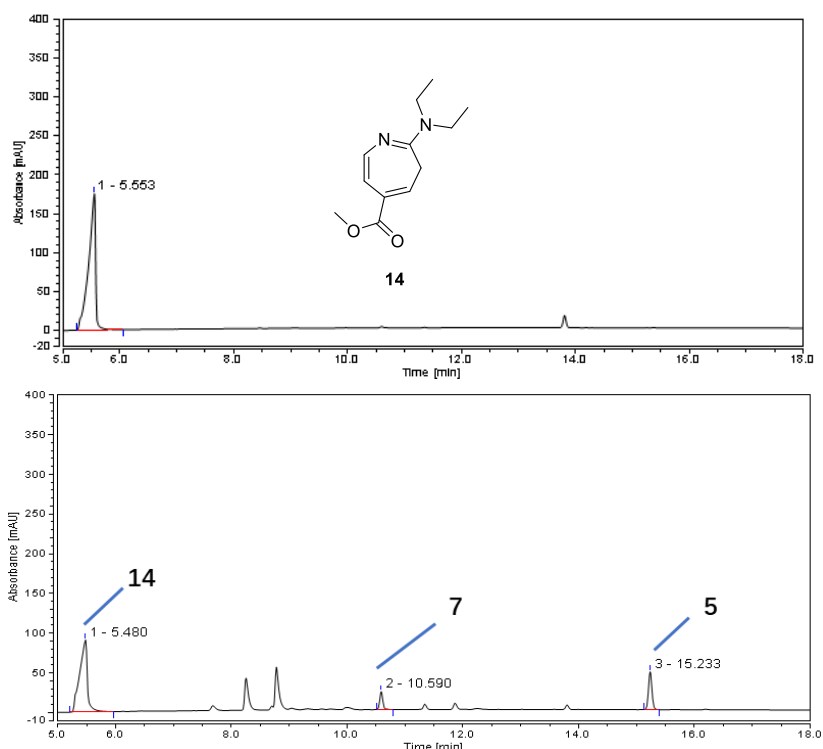

**Figure S10.** HPLC traces for conversion of compound **5** to **7** and **14** under  $2 \times 4W$  468 nm blue LEDs ( $10.4 \text{ mW/cm}^2$ ) (48 h irradiation): the standard compounds **5**, **7** and **14** and the reaction mixtures. The conversion of **5** was 86%, yields of **7** and **14** were 13% and 52%, respectively. HPLC conditions were identical to those shown in Table S1.

## II. Protein Photolabeling *in Vitro*

### General procedure

To a solution of  $2 \mu\text{M}$  bovine serum albumin (BSA) in PBS buffer (10 mM, pH 7.4) in 1.5 mL colorless EP tubes was added the biotin probe ( $100 \mu\text{M}$ , 50 mM stock solution in DMSO), organic dyes ( $100 \mu\text{M}$ , 50 mM stock solution in DMSO) and other additives. The solution was mixed and irradiated at  $25 \text{ }^\circ\text{C}$  with 468 nm blue LEDs (8 cm from the LED,  $5.8 \text{ mW/cm}^2$ ) or a smart xenon lamp light source CEL-HXF300E/HXUV300E (CEAULIGHT) equipped with band-pass filters (15 cm from the Xe lamp,  $19.8 \text{ mW cm}^{-2}$ ).

### Western blotting analysis

After photolabeling, samples were added with  $5\times$  protein loading buffer (Sangon

*Biotech*, containing 313 mmol/L Tris-HCl (pH 6.8), 0.05% bromophenol blue, 50% glycerol, 10% SDS and DTT) and fully mixed, then directly subjected to SDS-polyacrylamide gel (10% acrylamide) electrophoresis (PAGE) at 180 V for 60 min.

The PAGE gels were transferred to the activated PVDF membrane with Trans-Blot Turbo Transfer System (*Bio-Rad*) and blocked with 4% BSA in TBST (0.1% Tween-20 in Tris-buffered saline) at 4 °C overnight. The blots were incubated with 0.2 µg/mL streptavidin-HRP (*Beyotime Biotechnology*) in TBST at room temperature for 60 minutes, then washed with TBST 3×10 minutes before development with SuperSignal West Pico reagent (*Thermo Scientific*) and obtained image with ChemiDoc XRS System and Image Lab Software (*Bio-Rad*). The duplicated PAGE gels were stained with Coomassie brilliant blue (CBB) and obtained image with ChemiDoc XRS System and Image Lab Software.

### **Effect of the reactive oxygen species on protein labeling**

To a solution of 2 µM bovine serum albumin (BSA) in PBS buffer (10 mM, pH 7.4) in 1.5 mL colorless EP tubes was added the AzPh-biotin probe **1** (100 µM, 50 mM stock solution in DMSO), organic dyes (100 µM, 50 mM stock solution in DMSO) and the reactive oxygen species. The solution was mixed and irradiated at 25 °C with 468 nm blue LEDs. We prepared stock solution of various ROS ( $^1\text{O}_2$ ,  $\text{O}_2^-$ ,  $\text{H}_2\text{O}_2$ ,  $\text{OCl}^-$ , t-BuOOH, CuOOH, and  $\bullet\text{OH}$ ) by adding reagents described in the literature<sup>6-7</sup> as following:

1. Preparation of  $^1\text{O}_2$  (10 mM): 10 mM NaOCl and 10 mM  $\text{H}_2\text{O}_2$
2.  $\text{O}_2^-$  (10 mM): 10 mM  $\text{KO}_2$
3.  $\text{H}_2\text{O}_2$  (10 mM): 30%  $\text{H}_2\text{O}_2$  solution diluted to 10 mM
4.  $\text{OCl}^-$  (10 mM): 10 mM NaOCl
5. t-BuOOH (10 mM): 10 mM tert-butylhydroperoxide
6. CuOOH (10 mM): 10 mM cumene hydroperoxide
7.  $\bullet\text{OH}$  (100 µM): 20 mM  $\text{FeSO}_4\cdot 7\text{H}_2\text{O}$  and 200 mM  $\text{H}_2\text{O}_2$ .

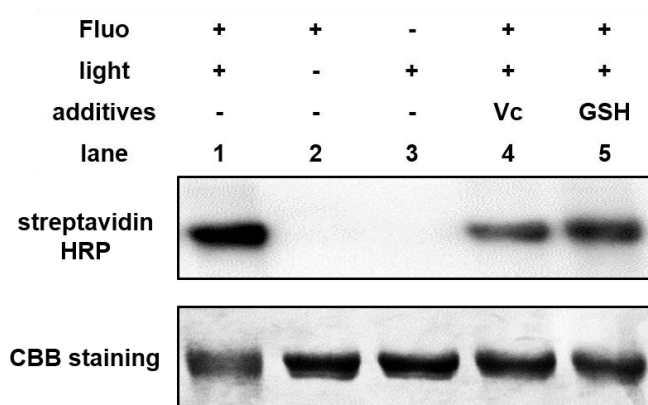

**Figure S11.** Photocatalytic labeling of BSA with the Phenol-biotin probe **2** and the control experiments. 1 mM ascorbates sodium (Vc) or glutathione (GSH) was added as additives. Samples were irradiated with 468 nm blue LEDs for 1 h in the air.

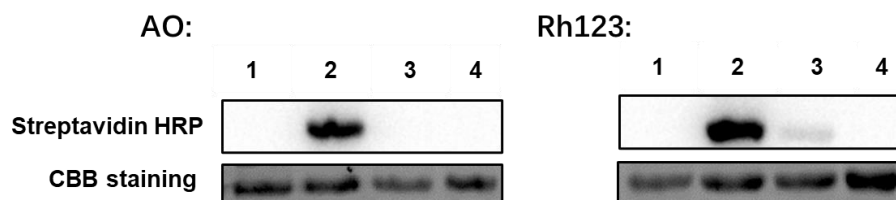

**Figure S12.** Photocatalytic BSA labeling with biotin probes **1-3** (100  $\mu$ M) using organic dyes (100  $\mu$ M) under the blue LED irradiation for 1 h in the air. Lane 1: blank; Lane 2: AzPh-biotin probe **1**; Lane 3: Phenol-biotin probe **2**; Lane 4: AcPh-biotin probe **3**.

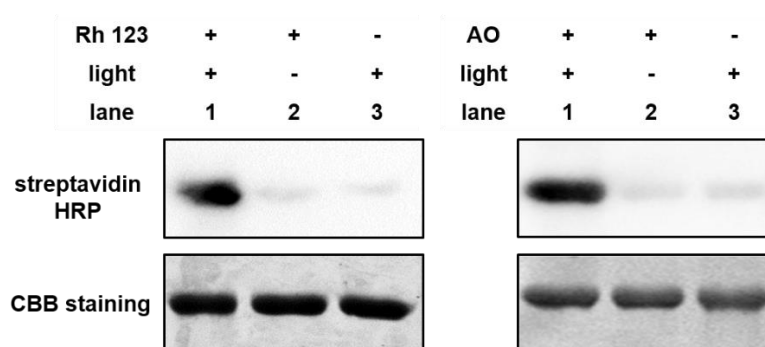

**Figure S13.** Control experiments of the photocatalytic labeling of BSA using different organic dyes and AzPh-biotin probe **1**. Rhodamine 123 (Rh 123) and Acridine Orange (AO) were used as the photocatalyst respectively. Samples were irradiated with 468 nm blue LEDs (5.8 mW/cm<sup>2</sup>) for 1 h in the air.



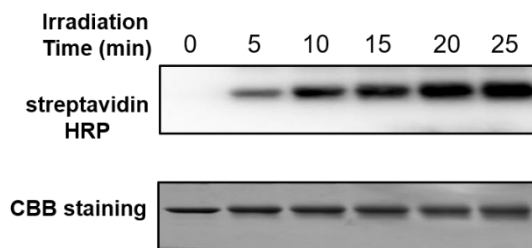

**Figure S14.** Time course of the photocatalytic BSA labeling by AzPh-biotin probe **1** (100  $\mu\text{M}$ ) with fluorescein (100  $\mu\text{M}$ ) under 468 nm (5.8  $\text{mW}/\text{cm}^2$ ) LED light irradiation in the air.

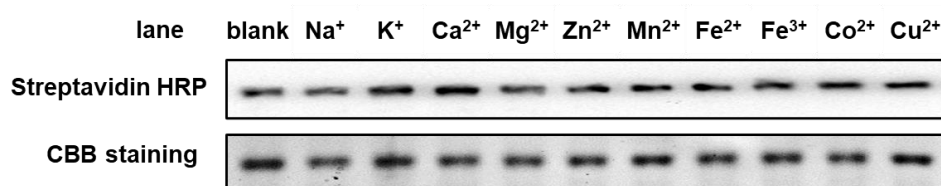

**Figure S15.** Effects of the metal ions on the photocatalytic BSA labeling by AzPh-biotin probe **1** (100  $\mu\text{M}$ ) with fluorescein (100  $\mu\text{M}$ ) under 468 nm (5.8  $\text{mW}/\text{cm}^2$ ) LED light irradiation in the air atmosphere (20 min irradiation). The concentrations of Na<sup>+</sup>, K<sup>+</sup>, Ca<sup>2+</sup>, Mg<sup>2+</sup> were 1 mM, and concentrations of Zn<sup>2+</sup>, Mn<sup>2+</sup>, Fe<sup>2+</sup>, Fe<sup>3+</sup>, Co<sup>2+</sup>, Cu<sup>2+</sup> were 100  $\mu\text{M}$ .

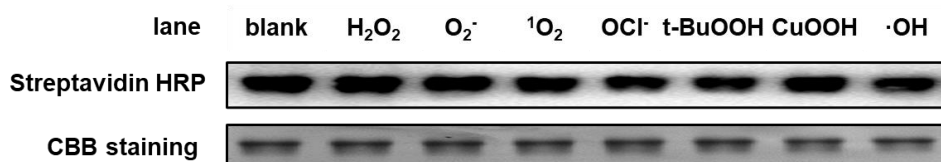

**Figure S16.** Effects of the reactive oxygen species on the photocatalytic BSA labeling by AzPh-biotin probe **1** (100  $\mu\text{M}$ ) with fluorescein (100  $\mu\text{M}$ ) under 468 nm (5.8  $\text{mW}/\text{cm}^2$ ) LED light irradiation in the air atmosphere (20 min irradiation). The concentrations of H<sub>2</sub>O<sub>2</sub>, O<sub>2</sub><sup>-</sup>, <sup>1</sup>O<sub>2</sub>, OCl<sup>-</sup>, t-BuOOH (tert-butylhydroperoxide) and CuOOH (cumene hydroperoxide) were 100  $\mu\text{M}$ , while the concentration of ·OH was 1  $\mu\text{M}$ .<sup>6-7</sup>

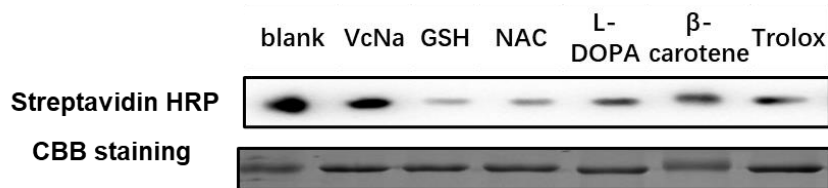

**Figure S17.** Effects of the radical quenchers or reductants on the photocatalytic BSA labeling by AzPh-biotin probe **1** (100  $\mu\text{M}$ ) with fluorescein (100  $\mu\text{M}$ ) under 468 nm ( $5.8 \text{ mW/cm}^2$ ) LED light irradiation in the air atmosphere (20 min irradiation). The concentrations of additives were 1mM.

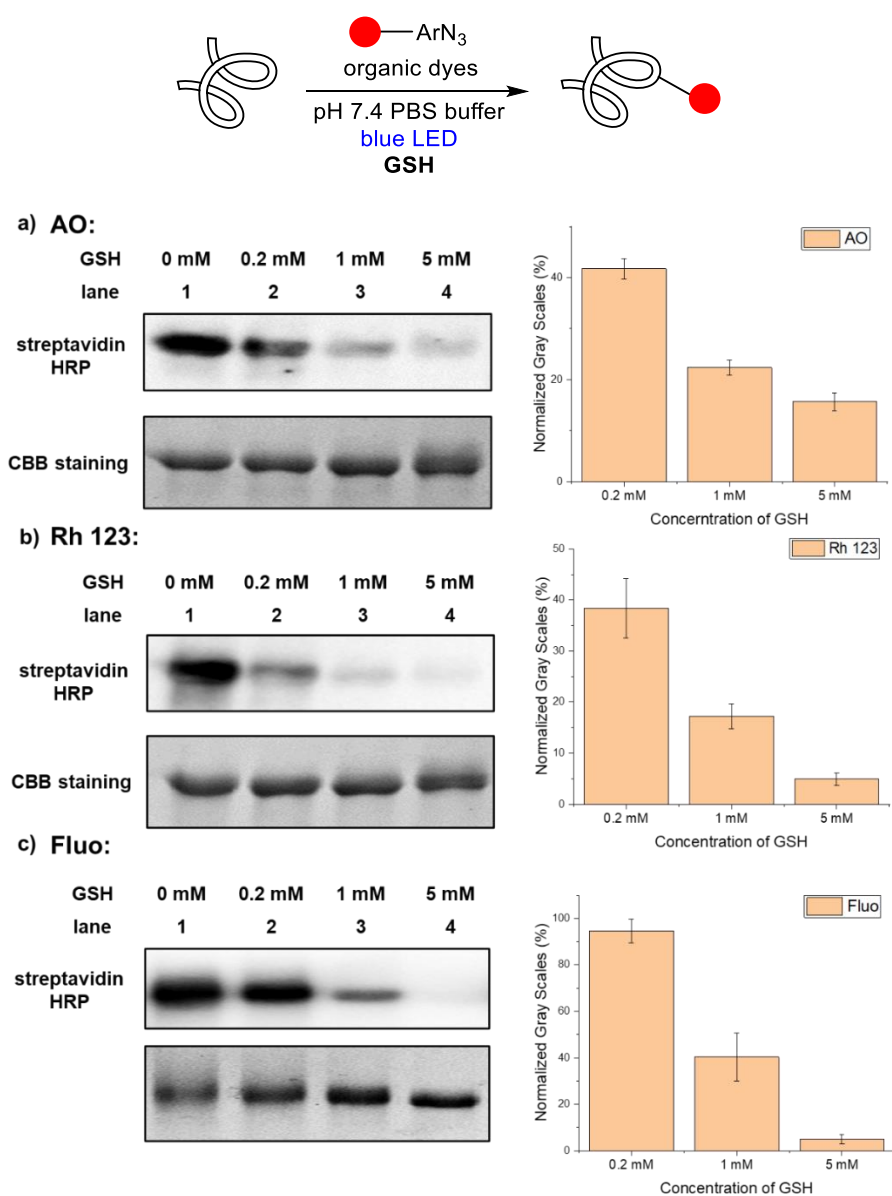

**Figure S18.** Photocatalytic labeling of BSA with AzPh-biotin probe **1** in the presence of different concentrations of glutathione (GSH) under 468 nm ( $5.8 \text{ mW/cm}^2$ ) LED

light irradiation for 20 min. Acridine Orange (AO), Rhodamine 123 (Rh 123) and Fluorescein (Fluo) were used as the photocatalyst respectively (**a-c**). Left: the western blotting assay. Right: Normalized gray scale of the western blotting assay. The gray scales of lanes were calculated with the Image Lab Software (*Bio-Rad*), and lane 1 in each group (without GSH addition) was set as the 100% standard respectively. Data were expressed as mean and SD, n=3.

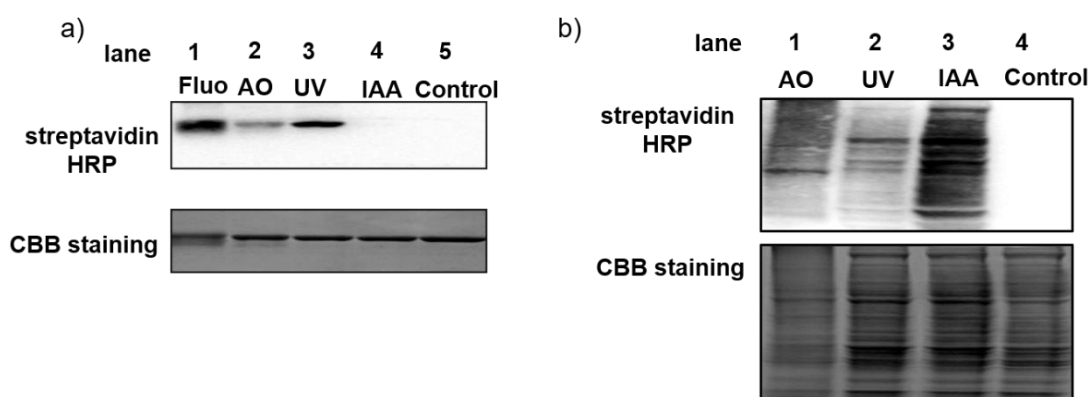

**Figure S19.** Evaluation of the photocatalytic labeling reactivity on BSA (a) and MCF-7 cell lysates (b). Photocatalytic labeling with AzPh-biotin probe **1** (100  $\mu$ M) and Fluo / AO (100  $\mu$ M) was carried out under 468 nm (2.95 mW/cm<sup>2</sup>) LED light irradiation on BSA (20 min irradiation) and MCF-7 lysate (10 min irradiation). UV photolabeling with AzPh-biotin probe **1** (100  $\mu$ M) was carried out under 365 nm UV lamp (7.92 mW/cm<sup>2</sup>) on BSA (20 min irradiation) and MCF-7 lysate (10 min irradiation); IAA Protein labeling with Biotin-iodoacetamide (IAA) (100  $\mu$ M) was carried out under 37 °C for 1.5 h. Control group were protein or cell lysates treated without light and AzPh-biotin probe **1**.

### **III. Mammalian Cell Studies**

#### **Mammalian cell culture**

MCF-7 cells and HeLa cells used in the experiments were purchased from ATCC. Cells were grown in the Dulbecco's modified Eagle's medium (DMEM, *Hyclone*) supplemented with 10% fetal bovine serum (FBS, *Gibco*) and 100 U/mL Penicillin-Streptomycin (Pen strep, *Gibco*) under a humidified atmosphere of 5% CO<sub>2</sub> at 37 °C. Dulbecco's phosphate buffered saline solution (DPBS) was purchased from Hyclone. Ultra-pure dimethylsulfoxide (DMSO) was purchased from Amresco.

#### **General procedure of photolabeling in live cells**

Cells were seeded in the appropriated dishes or plates in the culture media. At 80-90% confluence, 10 μM organic dyes was added to the media and incubated for 20 min. Cells were washed with DPBS for three times, then incubated in the fresh DMEM (no phenol red) containing 200 μM AzPh-biotin probe **1** for 30 min. The cell culture was irradiated with the 515 nm green LED (10 cm from the top of the cell culture dish, 2.9 mW/cm<sup>2</sup>) for 30 min (Acridine Orange) or 60 min (Rhodamine 123) at 37 °C under air atmosphere. For control experiments, cells were added with the same amount of DMSO instead of organic dyes (no photocatalyst group), or kept in the dark during light irradiation (dark group). For UV-light induced photolabeling, the culture media was changed to fresh DMEM (no phenol red) containing 200 μM AzPh-biotin probe **1** at 80-90% confluence. After incubation for 30 min, cells were irradiated with a handy 365 nm UV lamp (1 cm from the top of cell culture dish, 11.8 mW/cm<sup>2</sup>) at 37 °C. The light intensity of the UV lamp was measured with a UV-B photometer (*BNU Photoelectric Instrument*).

#### **Confocal imaging analysis**

Cells were seeded in a 12-well plate with glass coverslip in the culture media. After photolabeling, cells were washed three times with DPBS, then fixed with 4% paraformaldehyde in PBS at room temperature for 15 minutes. Cells were washed three times with PBS before permeabilized with 0.2% Triton X-100 in PBS at room temperature for 10 minutes. After PBS washing, the fixed cells were blocked with 4%

BSA in PBS at room temperature for 30 minutes, then incubated with 1  $\mu\text{g}/\text{mL}$  Cy5-streptavidin (*Jackson ImmunoResearch*) in PBS at room temperature for 60 minutes. Samples were washed 4 $\times$ 5 minutes with PBS before mounted with Fluorescent Mounting Medium (*Dako*) and sealed with the nail polish. Images were acquired on a Leica TCS SP8 confocal laser scanning microscopy platform with 40 $\times$  dry objective lens or 63 $\times$  oil-immersion objective lens by using the following regular settings: 488 nm laser with FICT filter (Em 495-530 nm), 561 nm laser with TRITC filter (Em 575-615 nm), and 633 nm laser with Cy5 filter (Em 650-690 nm). For mitochondria-specific labeling, 5  $\mu\text{M}$  mitochondria indicator TMRE was added to the media together with Rhodamine 123. Digital pictures of different samples in each group were taken under identical conditions of gain and exposure, and the pictures in different channels were merged using ImageJ. The colors of TRITC channel (TMRE) and Cy5 channel (Cy5-streptavidin) were set as green and red respectively. Pearson's correlation coefficient ( $R$ ) was calculated using Coloc 2 plugin in ImageJ.

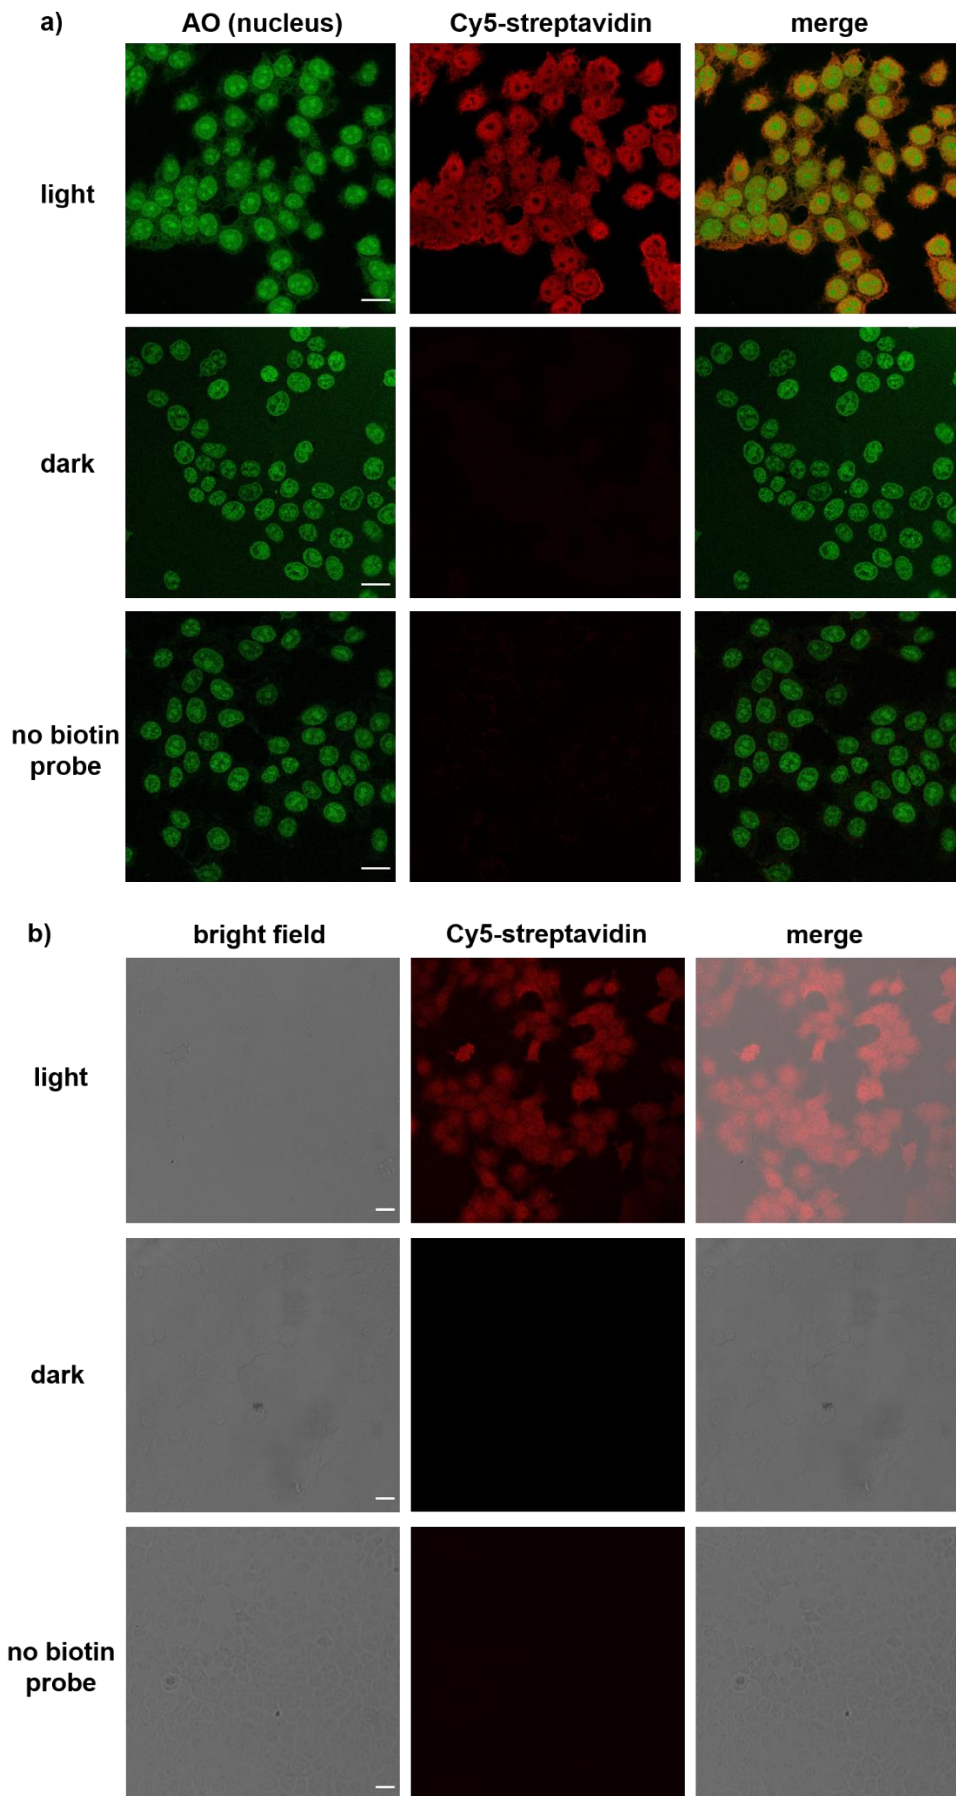

**Figure S20.** Confocal imaging analysis of AO promoted photocatalytic labeling with AzPh-biotin probe **1** (200  $\mu\text{M}$ ) and the control experiments in MCF-7 cells. The cell culture of light and no biotin probe group was irradiated with the 515 nm green LED (2.9  $\text{mW}/\text{cm}^2$ ) for 30 min **a**) Images of Cy5 channel were merged with FITC channel (AO); **b**) Images of Cy5 channel were merged with bright field. Samples kept in dark instead of light irradiation (dark) and without the addition of AzPh-biotin probe **1** (no biotin probe) were set as the control experiments. Images in panel **a** and **b** were obtained from different samples. Cells were fixed with paraformaldehyde after photolabeling, and the biotin labeling signals were detected with Cy5-streptavidin. Images were merged with ImageJ, and the color of Cy5 channel was set as red. Scale bar: 20  $\mu\text{m}$ .

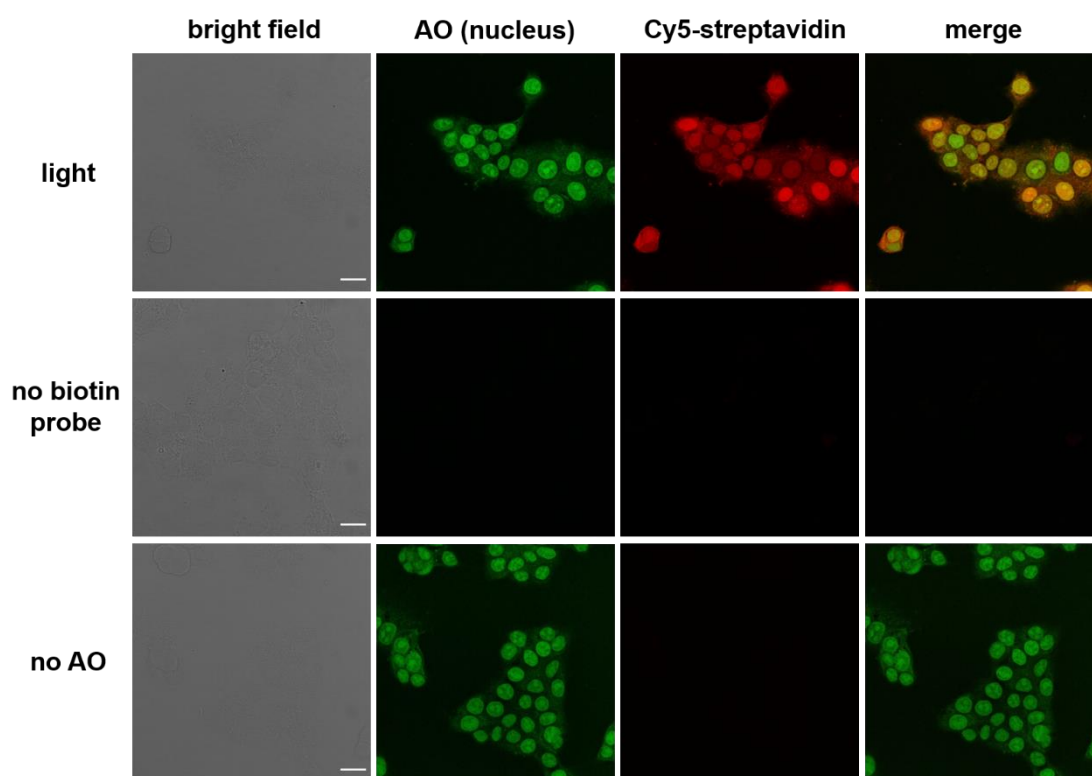

**Figure S21.** Confocal imaging analysis of AO promoted photocatalytic labeling with AzPh-biotin probe **1** (100  $\mu\text{M}$ ) after a 520 nm (95  $\text{mW}/\text{cm}^2$ ) LED light irradiation for 1 min. Cells were fixed with paraformaldehyde after photolabeling, and the biotin labeling signals were detected with Cy5-streptavidin. Images were merged with ImageJ, and the color of Cy5 channel was set as red. Scale bar: 20  $\mu\text{m}$ .



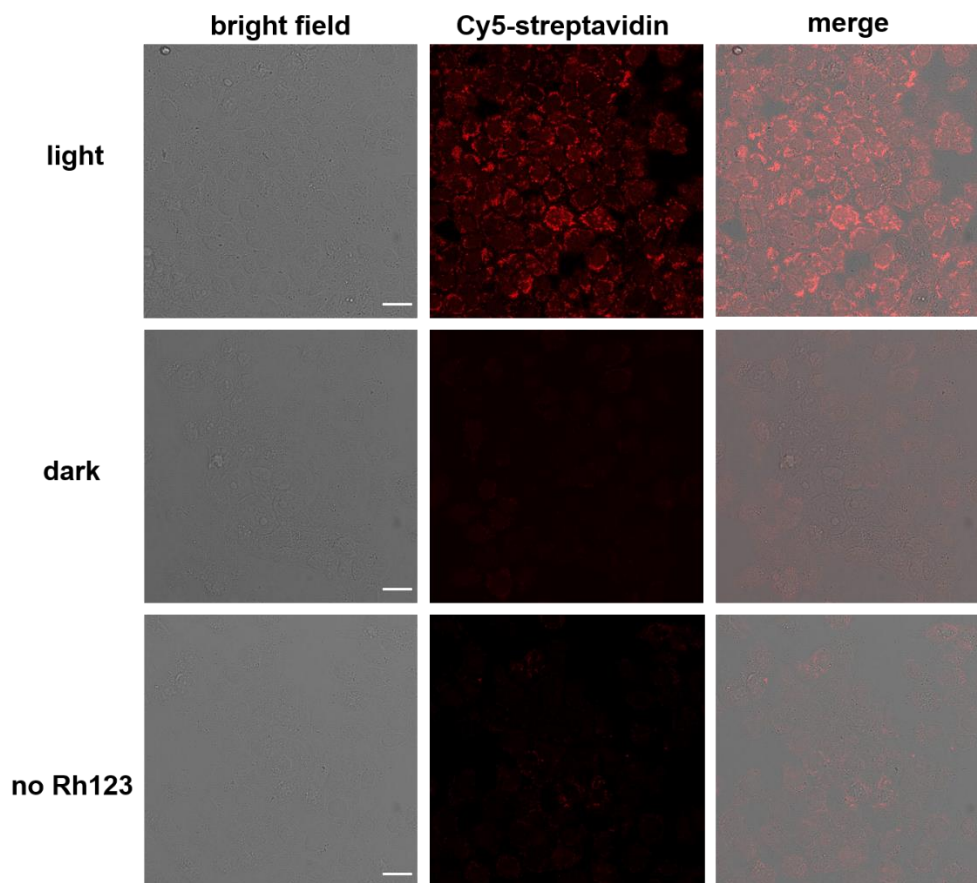

**Figure S22.** Confocal imaging analysis of Rh 123 promoted photocatalytic labeling with AzPh-biotin probe **1** (200  $\mu\text{M}$ ) and the control experiments in MCF-7 cells. The cell culture of light and no biotin probe group was irradiated with the 515 nm green LED (2.9  $\text{mW}/\text{cm}^2$ ) for 60 min. Images of Cy5 channel were merged with the bright field and shown as the merge. Samples kept in the dark instead of light irradiation (dark) and without the addition of Rh 123 (no Rh 123) were set as the control experiments. Cells were fixed with paraformaldehyde after photolabeling, and biotin labeling signals were detected with Cy5-streptavidin. Images were merged with ImageJ and the color of Cy5 channel was set as red. Scale bar: 20  $\mu\text{m}$ .

### **Cell lysis**

After photolabeling, cells were washed three times with DPBS, then detached with a cell scraper and lysed in 1 mL RIPA lysis buffer (*Beyotime Biotechnology*, containing 50 mM Tris (pH 7.4), 150 mM NaCl, 1% Triton X-100, 1% sodium deoxycholate, 0.1% SDS, 1× protease cocktail and 1 mM PMSF) at 4 °C. Lysates were collected by centrifugation at 13,000 rpm for 10 minutes at 4 °C. The supernatants were collected, and the concentrations of solubilized proteins in each group were normalized with BCA assay kit (*Beyotime Biotechnology*) for immunoprecipitation and western blotting analysis.

### **Western blotting analysis**

Cell lysates were added with 5× protein loading buffer and heated at 98 °C for 5 min, then subjected to SDS-polyacrylamide gel (10% acrylamide) electrophoresis (PAGE) at the condition of 180 V for 60 min. The PAGE gels were transferred to the activated PVDF membrane with Trans-Blot Turbo Transfer System (*Bio-Rad*) and blocked with 4% BSA in TBST (0.1% Tween-20 in Tris-buffered saline) at 4 °C overnight. The blots were incubated with 0.2 µg/mL streptavidin-HRP (*Beyotime Biotechnology*) in TBST at room temperature for 60 minutes, then washed with TBST 3×10 minutes before development with SuperSignal West Pico reagent (*Thermo Scientific*) and obtained image with ChemiDoc XRS System and Image Lab Software (*Bio-Rad*). The duplicated PAGE gels were stained with Coomassie brilliant blue (CBB) and obtained image with ChemiDoc XRS System and Image Lab Software.

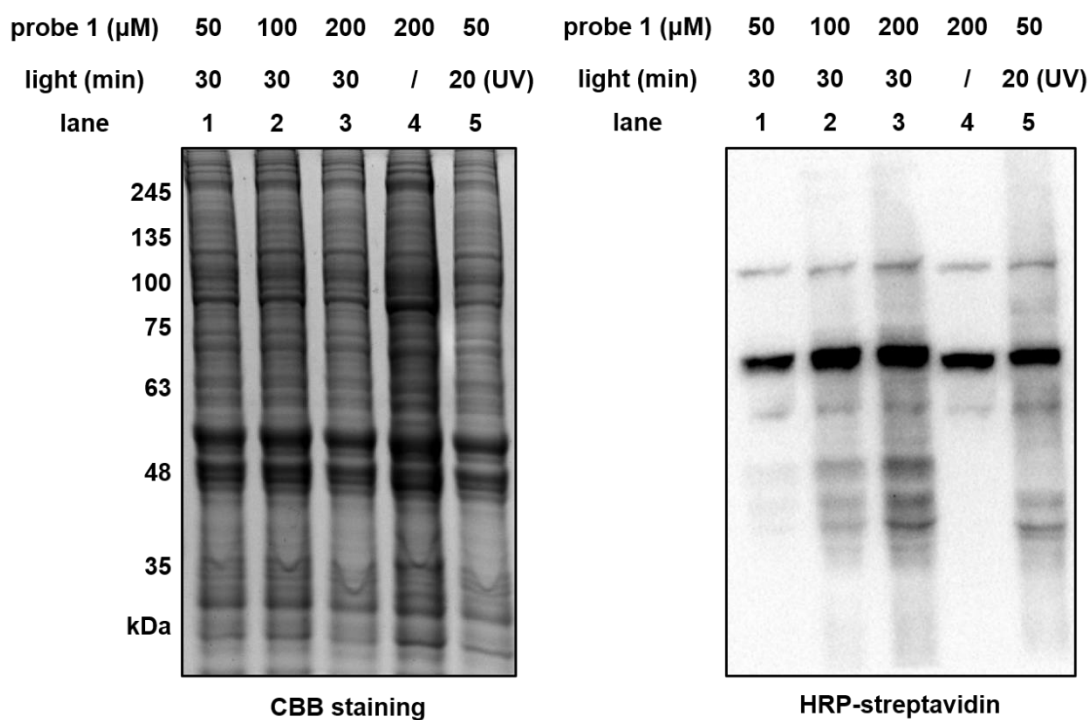

**Figure S23.** Western blotting analysis of photocatalytic biotinylation in MCF-7 cells with different concentrations of AzPh-biotin probe **1**. Cells were labeled with Rhodamine 123 under the irradiation with 515 nm green LEDs ( $2.9 \text{ mW/cm}^2$ ). For UV-induced labeling, cells were irradiated with 365 nm UV-light ( $11.8 \text{ mW/cm}^2$ ) for 20 min. Biotin signals in lane 4 indicated the endogenous biotinylated proteins.<sup>8</sup>

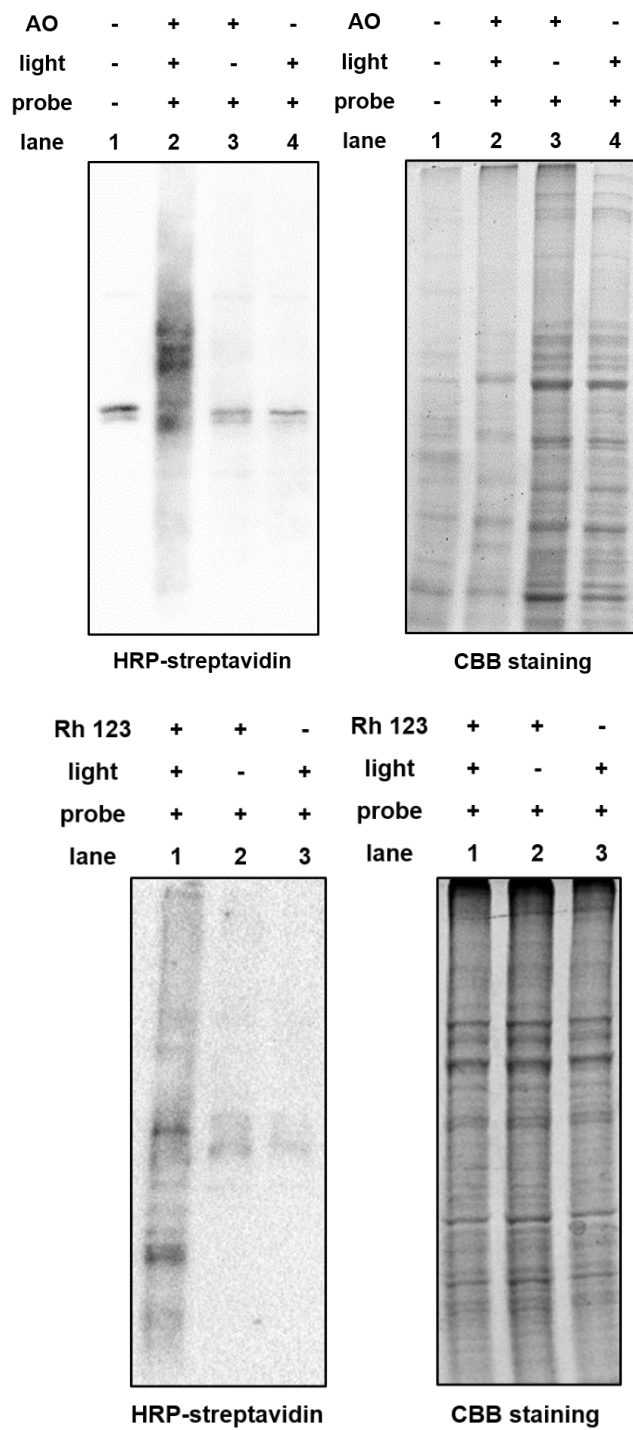

**Figure S24.** Western blotting analysis of photocatalytic biotinylation with the AzPh-biotin probe **1** (200  $\mu$ M) in MCF-7 cells and the control experiments. Cells were labeled with Acridine Orange (AO, top) or Rhodamine 123 (Rh 123, bottom) under the irradiation with 515 nm green LEDs (2.9 mW/cm<sup>2</sup>) for 30 min and 60 min, respectively.

### **Photocytotoxicity assay in MCF-7 cells**

MCF-7 cells were seeded in a 24-well plate at a density of  $2 \times 10^5$  cells/mL under a humidified atmosphere of 5% CO<sub>2</sub> in air at 37 °C for 24 h in DMEM. The Cells were then incubated with 20 μM Rhodamine 123 or 10 μM Acridine Orange for 20 min. After washing with DPBS for three times, the cells were incubated in fresh DMEM (no phenol red) containing 100 μM AzPh-biotin probe **1** for another 30 min. The cell culture was irradiated with the 515 nm green LED (10 cm from the top of cell culture dish, 2.9 mW/cm<sup>2</sup>) for 30 min (Acridine Orange) or 60 min (Rhodamine 123) at 37 °C under air atmosphere. Control experiments were carried out as cells cultured with or without organic dyes or AzPh-biotin probe **1** under light irradiation or not. After the photocatalytic labeling reaction, MTT reagent were added to each well and incubated for 4 h. The produced formazan was dissolved in 0.5 mL of DMSO and the absorbance at 570 nm was measured with a Spectramax Microwell plate reader (Molecular Devices). The background absorbance was measured and subtracted at 690 nm. The cell viability was calculated as  $Abs_{570} - Abs_{690}$ . The cell viability of cells dealt without small molecules and light irradiation was used as a 100% standard in normalization.

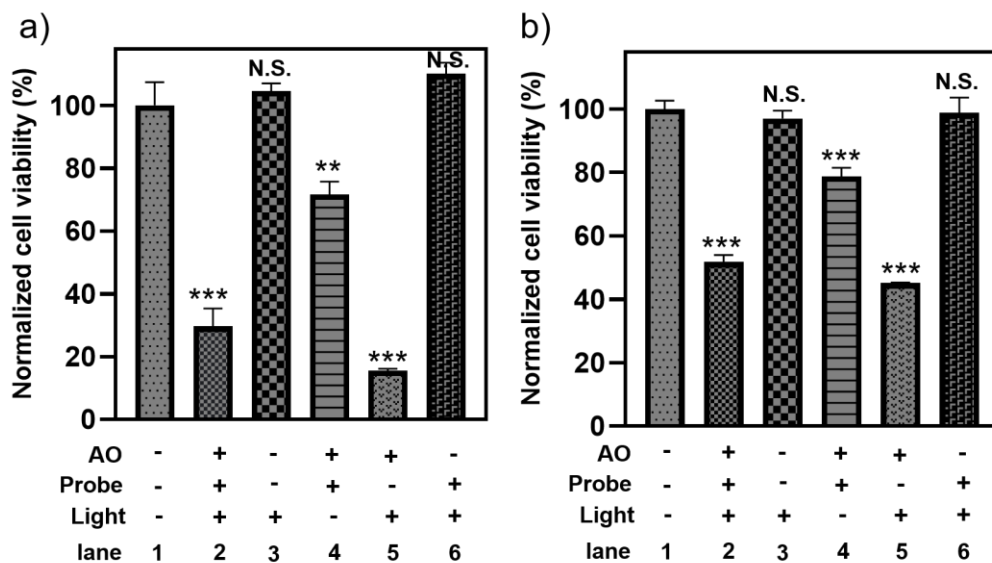

**Figure S25.** Phototoxicity of photocatalytic reactions in live MCF-7 cells with AzPh-biotin probe **1** (100  $\mu\text{M}$ ) and AO (10  $\mu\text{M}$ ) under a 515 nm (2.9  $\text{mW}/\text{cm}^2$ ) LED light for 30 min **(a)** or 520 nm (95  $\text{mW}/\text{cm}^2$ ) LED light for 1 min **(b)**. The statistical significance of the differences between groups was evaluated with the unpaired t test. P value of 0.05 and below was considered significant:  $p < 0.01$  (\*\*),  $p < 0.001$  (\*\*\*), N.S. is not statistically significant. All p-values were calculated with control cells that treated without light and small molecules. Error bars represented mean  $\pm$  SD ( $n = 3$ ).

### Photolabeling of mammalian cells after rotenone treatment

HeLa cells were seeded in appropriated dishes or plates in culture media. At 60-70% confluence, Rotenone was added to each group in different concentrations. The control group with the same amount of DMSO was set as the blank. Cells were incubated for 24 h, then underwent the photolabeling procedure as described above.

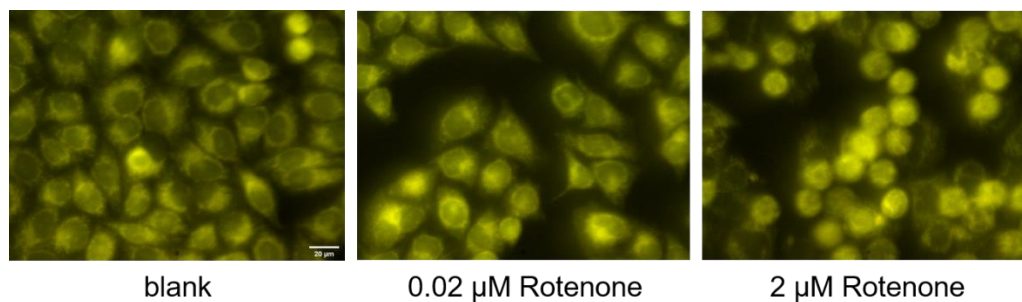

**Figure S26.** TMRE-staining analysis of Rotenone-treated HeLa cells. At 60-70% cell confluence, Rotenone was added to each group in different concentrations and the control group added with the same amount of DMSO instead of Rotenone was set as the blank. After 24 h incubation, 5  $\mu\text{M}$  TMRE was added to each cell media for mitochondria staining. Cells were incubated for 20 min, then washed with PBS for three times before fluorescent imaging. Images were acquired on a DMi8 Leica fluorescence microscopy platform with 40 $\times$  objective lens and TRITC filter. Digital pictures of different samples in each group were taken under identical conditions of gain and exposure. Positively-charged TMRE localizes in the negatively-charged mitochondrial inner membrane, and can be used as the fluorescent indicator of mitochondrial membrane potential. Significant changes of TMRE location in most of cells were observed compared with the control (blank) after 2  $\mu\text{M}$  Rotenone treatment, indicating the loss of membrane potential induced by high concentration of Rotenone. Scale bar: 20  $\mu\text{m}$ .

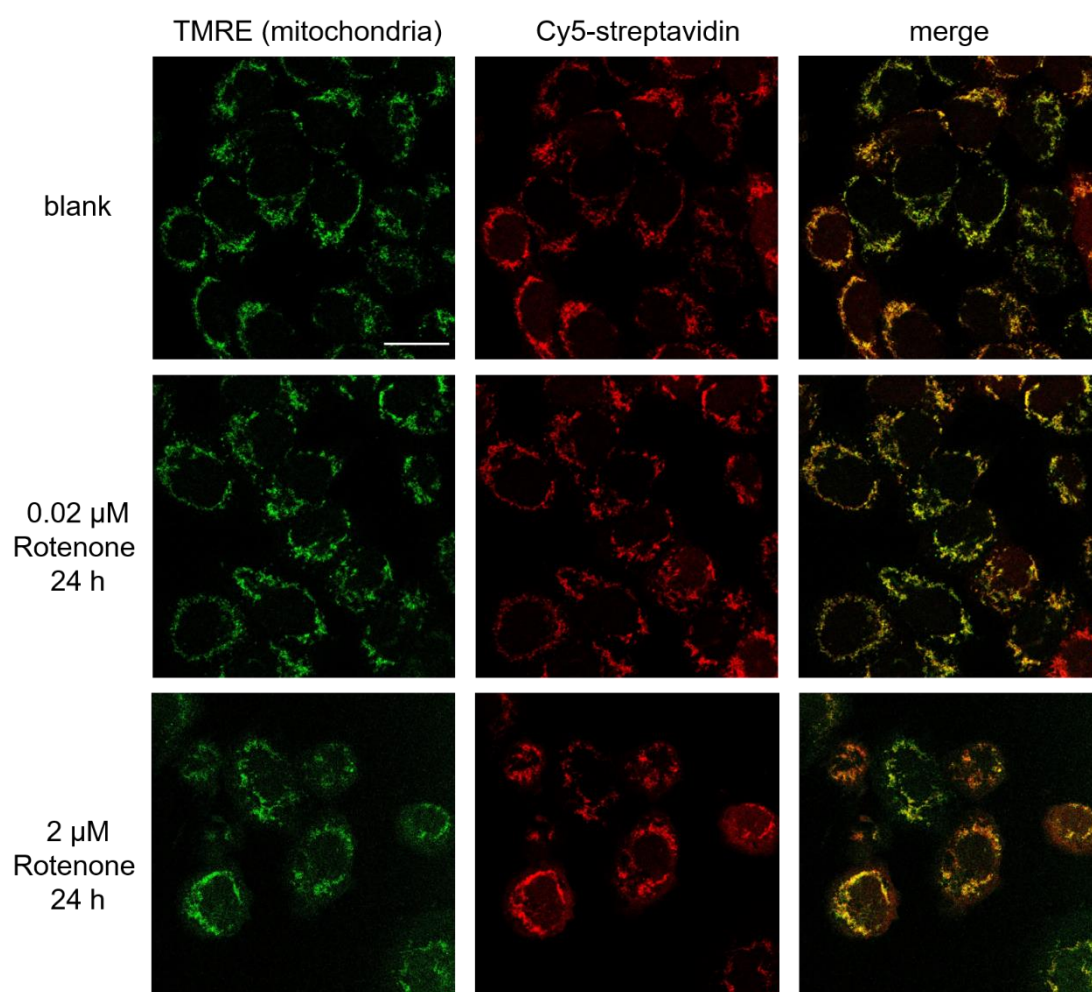

**Figure S27.** Confocal imaging analysis of the photolabeling of Rotenone-treated HeLa cells with AzPh probe **1** (200  $\mu$ M). The cell culture was irradiated with the 515 nm green LED (2.9 mW/cm<sup>2</sup>) for 30 min. Cells were fixed with paraformaldehyde after photolabeling, and biotin labeling signals were detected with Cy5-streptavidin. Images of Cy5 channel were merged with TRITC channel using ImageJ and the color of TRITC channel (TMRE) and Cy5 channel were set as green and red respectively. Scale bar: 20  $\mu$ m.



#### **IV. Protein and peptide analysis by LC-MS/MS**

##### **LC-MS/MS sample preparation for identification the modification sites**

The photocatalytic labeling on BSA protein was carried out with AzPh-biotin probe **1** (100  $\mu\text{M}$ ) and Acridine Orange (100  $\mu\text{M}$ ) under the 468 nm blue LED (10 cm from the top of the protein samples, 5.8  $\text{mW}/\text{cm}^2$ ) irradiation for 20 min. The photocatalytic labeling in MCF-7 cells was carried out with AzPh-biotin probe **1** (100  $\mu\text{M}$ ) and Acridine Orange (10  $\mu\text{M}$ ) under the 515 nm green LED (1 cm from the top of the cell plate, 95  $\text{mW}/\text{cm}^2$ ) irradiation for 20 min. The labeled cells were lysed with RIPA buffer. All labeled proteins were precipitated with the chilled acetone, and then resolubilized in RIPA. The samples were diluted with 8 M urea (final conc. 4 M), and reduced with 20 mM DTT at 65  $^{\circ}\text{C}$  for 5 min, and alkylated with 40 mM iodoacetamide at 37  $^{\circ}\text{C}$  for 30 min. The mixtures were then precipitated with 20% methanol containing acetone. The collected pellet of proteins was solubilized in urea buffer (2 M urea, 100 mM Tris-HCl, pH 8.0 and incubated with trypsin ( $w:w = 1:100$ ) for 16 h at 37  $^{\circ}\text{C}$ . After boiling at 65 $^{\circ}\text{C}$  for 5 min, the resulting solutions were diluted with Tris-HCl, pH 8.0 and incubated with magnetic streptavidin beads (MyOne<sup>TM</sup> Streptavidin T1, Invitrogen) for 2 h with continuous rotation. The beads were successively washed with PBS buffer containing 1% NP40, PBS, water and 10%  $\text{CH}_3\text{CN}/\text{water}$ . The labeled peptides were eluted with 50%  $\text{CH}_3\text{CN}/\text{water}$  (2% TFA). These eluents were collected, freeze-dried and redissolved in water for further LC-MS/MS analysis.

##### **Site-specific LC-MS/MS analysis of labeled peptide**

The biotinylated peptides were desalted, and analyzed on a nano HPLC coupled to a timsTOF Pro mass spectrometer (Bruker Daltonics). Peptides were separated on a 25cm  $\text{C}_{18}$  UHPLC column (IonOpticks) through a 120-min gradient. PASEF mode was chosen for the timsTOF Pro. The values for mobility-dependent collision energy ramping were set to 59 eV at 1.6  $\text{Vs}/\text{cm}^2$  and 20 eV at 0.6  $\text{Vs}/\text{cm}^2$ . Target intensity per individual PASEF precursor was set to 20,000. The scan range was set between 100  $\text{m}/\text{z}$  and 1700  $\text{m}/\text{z}$ . Active exclusion was enabled for 0.4 min (mass width 0.015  $\text{m}/\text{z}$ , 1/ $k_0$

width 0.015 Vs/cm<sup>2</sup>).

MS data were processed by the PEAKS Studio 10.6 software (Bioinformatics Solutions Inc) for both de novo sequencing and database search. For de novo and database search, precursor mass tolerance was set to 15 ppm, and fragment mass tolerance was set to 0.05 Da. Carbamidomethylation of Cys (+57.0125) was set as the fixed modification. Variable modifications were analyzed in three independent searches. Biotinylation of Lys (+226.0776), oxidation of Met (+15.9949) and photocatalytic Azph-Biotin probe 1 modification (+491.2212) of Lys, Cys, Ser (1st search); Thr, Tyr, Asp (2nd search); and His, Gln, Glu, Gly (3rd search) were set as variable modifications. The false discovery rates for peptides and proteins were controlled at no larger than 1%. The minimum PTM AScore was set at 13.<sup>9</sup> The peptides with the highest scores were annotated as the identifications.

```

1 MKWVTFISLL LLFSSAYSRG VFRDTHKSE IAHRFKDLGE EHFKGLVLIA
51 FSQYLQQCPF DEHVKLVNEL TEFAKTCVAD ESHAGCEKSL HTLFGDELCK
101 VASLRETYGD MADCCEKQEP ERNECFLSHK DDSFDLPKPK PDPNTLCDEF
151 KADEKKFWGK YLYEIARRHP YFYAPPELLYY ANKYNGVFQE CCQAEDKGAC
201 LLPKIETMRE KVLASSARQR LRCASIQKFG ERALKAWSVA RLSQKFPKAE
251 FVEVTKLVTD LTKVHKECCH GDLLECADDR ADLAKYICDN QDTISSKLKE
301 CCDKPLLEKS HCIAEVEKDA IPENLPPLTA DFAEDKDVCK NYQEAKDAFL
351 GSFLYEYSRR HPEYAVSVLL RLAKEYEATL EECCAADDPH ACYSTVFDKL
401 KHLVDEPQNL IKQNCQFEK LGEYGFQNAL IVRYTRKVPQ VSTPTLVEVS
451 RSLGKVGTRC CTKPESERMP CTEDYLSLIL NRLCVLHEKT PVSEKVTKCC
501 TESLVNRRPC FSALTPDETY VPKAFDEKLF TFHADICTLP DTEKQIKQT
551 ALVELLKHKP KATEEQLKTV MENFVAFVDK CCAADDKEAC FAVEGPKLVV
601 STQTALA ←

```

**Figure S28.** Labeled residues on BSA. Modified residues were labeled in yellow

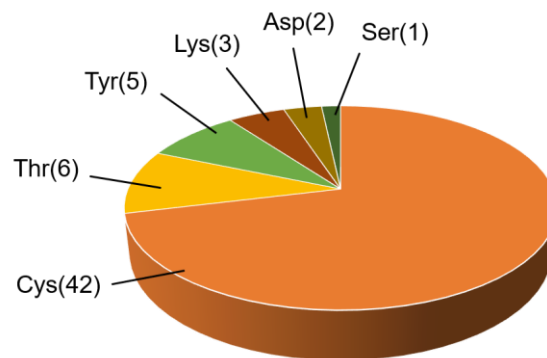

**Figure S29.** Modified amino acid residues after photocatalytic labeling in MCF-7 cells

**Table S3.** List of modified peptides and sites on photocatalytic BSA modification.<sup>a</sup>

Annotated Sequence

DTHKSEIAHR

ECCHGDLLECADDRADLAKYICDNQDTISSK

ECCHGDLLECADDRADLAK

LSQKFPK

YNGVFQECCQAEDK

LKHLVDEPQNLK

CASIQKFGER

VHKECCHGDLLECADDRADLAK

KQTALVELLKHKP

ALKAWSVAR

RHPEYAVSVLLR

KVPQVSTPTLVEVSR

KQTALVELLK

KFWG**K**YLYEIAR  
 YLYEIAR  
 KQTALVELLK  
 FWG**K**YLYEIAR  
 SHCIAEVE**K**DAIPENLPPLTADFAEDKDVCK  
 SHCIAEVE**K**DAIPENLPPLTADFAED**K**  
 SHCIAEVE**K**DAIPENLPPLTADFAEDKDVCK  
 QNCDQFE**K**LGEYGFQNALIVR  
 GACLLP**K**IETMR  
 GACLLP**K**IETMR  
 LGE**Y**GFQNALIVR  
 CCT**K**PESERMPCTEDYLSLILNR  
 MPCTEDYLSLILNR  
 MP**C**TEDYLSLILNR  
 GLVLIAF**S**QYLQ**C**PFDEHVK  
 DAFLGSFLY**E**YSR  
 VGTRCCT**K**PESERMPCTEDYLSLILNR  
 TVMENFVAFVD**K**CCAADDKEACFAVEGPK<sup>b</sup>  
**T**VMENFVAFVDKCCAADDKEACFAVEGPK  
 MPCT**E**DYLSLILNR  
 GLVLIAF**S**QYLQ**C**PFDEHVK

<sup>a</sup> The labeled sites were shown in red.

<sup>b</sup> It was considered as a false positive data after manual comparing the LC-MS/MS spectra in de novo sequencing and BSA database.

**Table S4.** List of modified peptides and sites on photocatalytic MCF-7 modification.<sup>a</sup>

| Annotated Sequence                 |
|------------------------------------|
| L <b>C</b> AAAASILGKPADR           |
| LLDLVQQ <b>S</b> CNYK              |
| GL <b>C</b> AIAQAESLR              |
| SFFLGQGLSALLP <b>C</b> VLALVQGVGR  |
| SLLINAVEAS <b>C</b> IR             |
| GID <b>Q</b> CIPLFVEAALER          |
| L <b>I</b> CLVTGSPSIR              |
| FSFCCSPEPEAEAEAAAAGPG <b>P</b> CER |
| NTG <b>I</b> CTIGPASR              |
| TIAE <b>C</b> LADELINA <b>A</b> K  |
| LYVYNTDTDN <b>C</b> R              |
| LILDV <b>F</b> CGSQMHFVR           |
| TKDD <b>I</b> ICEIGDVFK            |

LCEEWPVDETKR  
QLSSSVTGLTNIEEENCQR  
GPSGCVESLEVTQR  
SYCYVSKEELK  
VAVTEGCQPSR  
DVVICPDASLEDAKK  
IEYNDQNDGSCDVK  
ENVNVEEMFNCITELVLR  
SDCKEFSSEAR  
TNCNVAVINVGAPAAGMNAAVR  
ALNALCDGLIDELNQALK  
IECDDKGDGSCDVR  
VPLDVACAR  
SLHDALCVLAQTVK  
TNCNVAVINVGAPAAGMNAAVR  
ALENDPDCR  
TTGLVGLAVCNTPHER  
ALVDGPCTQVR  
LLCGLLAER  
LLVGNKCDLTTK  
LVDVICEK  
MDCQECPEGYR  
CITDPQTGLCLLPLKEK  
SGSQAHEQR  
ICPVETLVEEAIQCAEK  
GSDFDCELR  
ICPVETLVEEAIQCAEK  
YEELECLYAAVGK  
GCAVVEFK  
LAPIPPK  
IGEIVAEMDVPLHCR  
LLPALLILRAFKPHR  
AECMLQQAER  
YYDYGKDYIEFNK  
GYSFTTTAER  
KLTGRLMLAVGGAVLGSLLQFGYNTGVINAPQK  
KQTALVELLK  
SYELPDGQVITIGNER  
YEELECLYAAVGK  
EYQELMNTK  
YMACCMLYR  
TAALGLLLLCAAAAGAGK  
DVNVAIAAIK  
VTLLEGDHVR

AVTLECVSAGEPR  
EKHPDGKILIGGSIANFTNVAATFK

<sup>a</sup> The labeled sites were shown in red.

### **LC-MS/MS sample preparation for identification of the labeled proteins**

150  $\mu$ L streptavidin agarose resins (*G-Bioscience*) were washed three times with PBS, then the cell lysate samples (described above) were mixed with the streptavidin beads and incubated at room temperature for 2 h with gentle rotation. The beads were washed with 1 mL RIPA lysis buffer twice, then washed with 1 mL PBS five times. The biotinylated proteins binding on streptavidin beads were resuspended in 8 M urea with 100 mM Tris buffer (pH 8.5). 5 mM TCEP was added and incubated at room temperature for 20 min. Subsequently, 10 mM iodoacetamide was added and incubated at room temperature for 15 min in the dark. Samples were diluted with 100 mM Tris buffer (pH 8.5) by a factor of 4 with 1 mM  $\text{CaCl}_2$ , followed by the addition of 10  $\mu\text{g}/\text{mL}$  sequencing-grade modified trypsin (0.5 mg/mL, *Promega*), and were incubated under gentle mixing over night at 37 °C. The digestion was stopped by the addition of 5% formic acid, then the resulting peptides were desalted and concentrated with HC-C18 SPE cartridges (*CNW*). Samples of each group contained three replicates were treated with the identical condition.

### **LC-MS/MS analysis of the labeled proteins**

Peptides were analyzed by an HPLC EASY-nL-LC 1000 coupled with an online Q Exactive HF mass spectrometer (*Thermo Scientific*). Samples were loaded directly on a 100  $\mu\text{m}$  I.D. 150 mm analytic column (in-house packed, 1.9  $\mu\text{m}$ , C18 resin, *Dr.Maisch*). Mobile phase A consisted of 0.1% FA, 2% ACN and 98%  $\text{H}_2\text{O}$ , mobile phase B consisted of 0.1% FA, 2%  $\text{H}_2\text{O}$  and 98% ACN. A 60 min gradient (4% B at 0 min, 8% B at 4 min, 25% B at 45 min, 37% B at 53 min, 95% B at 57 min, at 95% B at 60 min) was used at a static flow rate of 300 nL/min. For MS1, the scan range of MS was 350 to 1500 m/z at a resolution of 60,000, and the AGC target was  $3\text{e}6$ . The maximum injection time for the precursor ion was 20 ms. For MS2, the resolution was

set to 30,000 and the AGC target was set to  $1e5$  with the maximum injection time of 45ms. High-energy collisional dissociation (HCD) was used to fragment the precursor peptides, normalized collision energy was 27.

### **MS data analysis of the labeled proteins**

MaxQuant software (version 1.5.3.30) was used for the protein identification and label-free quantitation. “Match between runs” was applied, and the match time window was set within 0.7 min. The MS data were searched against the UniProt human protein database (downloaded September 2016, #70,630 entries). Trypsin was set as the enzyme, and the maximum missed cleavage was set to 2. Carbamidomethyl (C) (+57.02 Da) was set as a fixed modification, and the variable modifications were oxidation of methionine (+15.99 Da) and protein N-terminal acetylation (+42.01 Da). The false-discovery rate (FDR) for peptides and proteins was set to 1%, and the minimum peptide length was set to 7. Proteins identified only by site modification or found in the decoy database were not included.

### **Subcellular proteome**

For identification of the subcellular-localization of photolabeling, the samples included one experiment group and two control groups (no photocatalyst group and dark group). The proteins quantified less than twice in three replicates of experiment group were removed. *P*-values of the experiment group to two control groups were calculated respectively with unpaired Student's t-test using label-free quantitation (LFQ) intensity. Average LFQs for each group were used for calculating the fold-change (FC) of experiment group comparing to the two control groups. Proteins with  $FC > 2$  and  $P < 0.05$  were defined as the enriched proteins.

For identification of the photolabeling of Rotenone-treated cells, the samples included one experiment group and one control group (added with DMSO as the blank). The proteins quantified at least twice in three replicates of both experiment group and the blank were reserved. Average LFQs for each group were used for calculating the fold-change (FC) of experiment group comparing to the blank. Proteins with  $P < 0.05$  were screened, and those with  $FC > 2$  or  $FC < 0.5$  were defined as increased measurements and decreased measurements proteins respectively.

The biological process (BP) and cellular component (CC) of screened proteins were annotated using DAVID Bioinformatics Resources (v6.8) and UniProt database.<sup>10-11</sup> MitoCarta 2.0 database was also used for annotating mitochondrial proteins.<sup>12</sup>

### **Statistical analysis**

All biological experiments were repeated 3 times independently unless otherwise noted. *P* values in unpaired Student's t-test were calculated with Excel and error bars represent mean  $\pm$  SD.



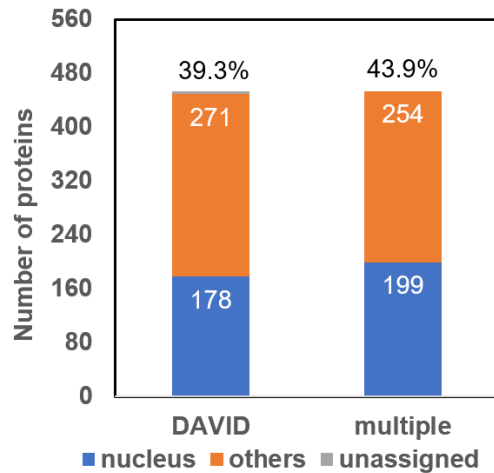

**Figure S30.** Counts of the proteins in AO promoted photolabeling of MCF-7 cells. Nucleic proteins were annotated only by DAVID (178/453, 39.3%, DAVID) or by the combination of DAVID and Uniprot database (199/453, 43.9%, multiple).

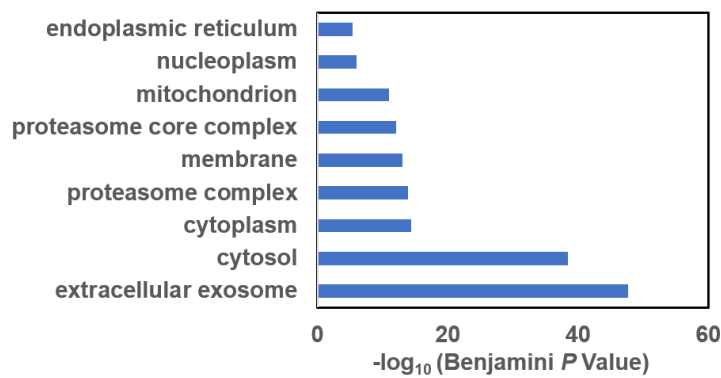

**Figure S31.** Classification of the identified proteins with cellular components in AO promoted photolabeling of MCF-7 cells. Proteins were annotated by DAVID.

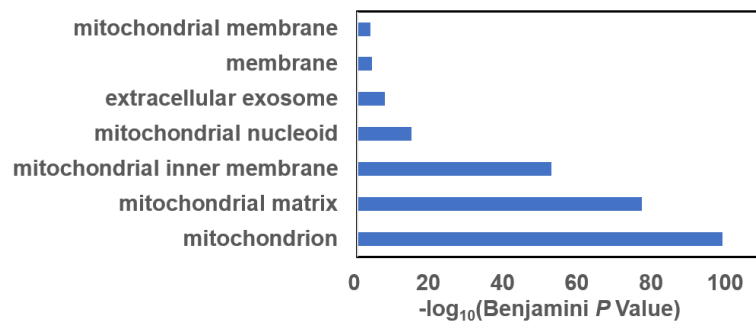

**Figure S32.** Classification of the identified proteins with cellular components in Rh 123 promoted photolabeling of MCF-7 cells. Proteins were annotated by DAVID.

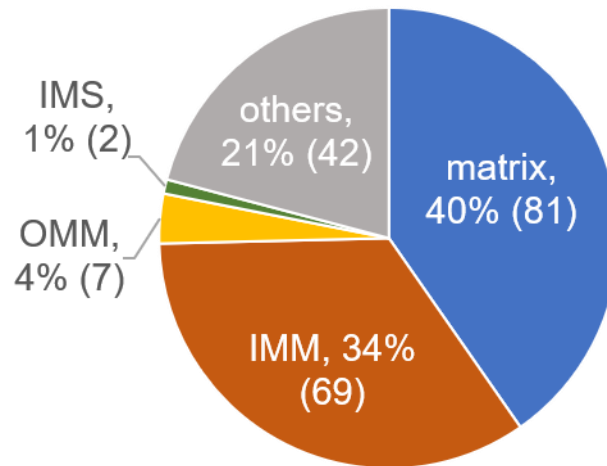

**Figure S33.** The sub-mitochondrial localization of the photocatalytic labeled proteome. The numbers of proteins in different sub-mitochondrial compartments are shown in parenthesis. Matrix: mitochondrial matrix; IMM: inner mitochondrial membrane; IMS: intermembrane mitochondrial space; OMM: outer mitochondrial membrane.

**Table S5.** List of the mitochondrial complex proteins in Rh 123 promoted photolabeling of MCF-7 cells.

| Protein/Gene Name                                                                            | Category     | Localization |
|----------------------------------------------------------------------------------------------|--------------|--------------|
| ATP synthase, H <sup>+</sup> transporting, mitochondrial F1 complex, O subunit(ATP5O)        | ATP synthase | IMM          |
| ATP synthase, H <sup>+</sup> transporting, mitochondrial Fo complex subunit B1(ATP5F1)       | ATP synthase | matrix       |
| ATP synthase, H <sup>+</sup> transporting, mitochondrial F1 complex, beta polypeptide(ATP5B) | ATP synthase | matrix       |
| ATP synthase, H <sup>+</sup> transporting, mitochondrial Fo complex subunit D(ATP5H)         | ATP synthase | IMM          |
| NADH:ubiquinone oxidoreductase core subunit S1(NDUFS1)                                       | complex I    | matrix       |
| NADH:ubiquinone oxidoreductase core subunit V2(NDUFV2)                                       | complex I    | IMM          |
| NADH dehydrogenase, subunit 4 (complex I)(ND4)                                               | complex I    | IMM          |
| NADH:ubiquinone oxidoreductase core subunit S3(NDUFS3)                                       | complex I    | IMM          |
| NADH:ubiquinone oxidoreductase core subunit S2(NDUFS2)                                       | complex I    | IMM          |
| succinate dehydrogenase complex flavoprotein subunit A(SDHA)                                 | complex II   | IMM          |
| succinate dehydrogenase complex iron sulfur subunit B(SDHB)                                  | complex II   | IMM          |
| ubiquinol-cytochrome c reductase, Rieske iron-sulfur polypeptide 1(UQCRFS1)                  | complex III  | IMM          |
| ubiquinol-cytochrome c reductase core protein I(UQCRC1)                                      | complex III  | IMM          |
| cytochrome c oxidase subunit 4I1(COX4I1)                                                     | complex IV   | IMM          |
| cytochrome c oxidase subunit 5B(COX5B)                                                       | complex IV   | IMM          |
| cytochrome c oxidase subunit 6C(COX6C)                                                       | complex IV   | IMM          |

|                                                          |             |        |
|----------------------------------------------------------|-------------|--------|
| cytochrome c oxidase subunit II(COX2)                    | complex IV  | IMM    |
| GrpE like 1, mitochondrial(GRPEL1)                       | PAM complex | matrix |
| peptidase, mitochondrial processing alpha subunit(PMPCA) | PAM complex | matrix |
| heat shock protein family D (Hsp60) member 1(HSPD1)      | PAM complex | matrix |
| peptidase, mitochondrial processing beta subunit(PMPCB)  | PAM complex | matrix |
| translocase of inner mitochondrial membrane 44(TIMM44)   | PAM complex | matrix |
| translocase of outer mitochondrial membrane 70(TOMM70)   | TOM complex | OMM    |

---

Note: mitochondrial matrix (matrix); inner mitochondrial membrane (IMM); intermembrane mitochondrial space (IMS); outer mitochondrial membrane (OMM).

**Table S6.** List of 31 proteins with <0.5-fold change (FC) in HeLa cells treated by high concentration (2  $\mu$ M) of Rotenone (severe toxicity).

| Protein/Gene Name                                                    | $\log_2$ (FC) | $-\log_{10}$<br>(P-value) | mitochondrial |
|----------------------------------------------------------------------|---------------|---------------------------|---------------|
| NADH:ubiquinone oxidoreductase subunit S6(NDUFS6)                    | -1.753        | 1.952                     | Yes           |
| cytochrome c oxidase subunit 4I1(COX4I1)                             | -1.732        | 1.641                     | Yes           |
| chondroitin sulfate proteoglycan 4(CSPG4)                            | -1.707        | 2.933                     | No            |
| isovaleryl-CoA dehydrogenase(IVD)                                    | -1.564        | 2.458                     | Yes           |
| carnitine palmitoyltransferase 2(CPT2)                               | -1.537        | 5.148                     | Yes           |
| leucine zipper and EF-hand containing transmembrane protein 1(LETM1) | -1.528        | 1.317                     | Yes           |
| dihydrolipoamide dehydrogenase(DLD)                                  | -1.457        | 4.373                     | Yes           |
| flavin adenine dinucleotide synthetase 1(FLAD1)                      | -1.387        | 1.346                     | No            |
| Mov10 RISC complex RNA helicase(MOV10)                               | -1.379        | 1.306                     | No            |
| succinate dehydrogenase complex flavoprotein subunit A(SDHA)         | -1.378        | 3.302                     | Yes           |
| tRNA methyltransferase 61B(TRMT61B)                                  | -1.345        | 2.363                     | Yes           |
| integrin subunit alpha 6(ITGA6)                                      | -1.325        | 3.378                     | No            |
| cytidine deaminase(CDA)                                              | -1.295        | 1.338                     | No            |
| aldehyde dehydrogenase 5 family member A1(ALDH5A1)                   | -1.276        | 2.469                     | Yes           |
| pitrilysin metalloproteinase 1(PITRM1)                               | -1.263        | 3.379                     | Yes           |
| complement C1q binding protein(C1QBP)                                | -1.260        | 1.806                     | Yes           |

|                                                     |        |       |     |
|-----------------------------------------------------|--------|-------|-----|
| ETHE1, persulfide dioxygenase(ETHE1)                | -1.250 | 2.250 | Yes |
| pyrophosphatase (inorganic) 2(PPA2)                 | -1.215 | 3.492 | Yes |
| hydroxysteroid 17-beta dehydrogenase 10(HSD17B10)   | -1.180 | 2.639 | Yes |
| NAD kinase 2, mitochondrial(NADK2)                  | -1.169 | 1.407 | Yes |
| transmembrane protein 65(TMEM65)                    | -1.161 | 2.485 | Yes |
| heat shock protein family E (Hsp10) member 1(HSPE1) | -1.136 | 2.577 | Yes |
| acyl-CoA dehydrogenase, very long chain(ACADVL)     | -1.131 | 3.554 | Yes |
| hydroxyacyl-CoA dehydrogenase(HADH)                 | -1.120 | 2.817 | Yes |
| enoyl-CoA hydratase, short chain 1(ECHS1)           | -1.115 | 3.730 | Yes |
| thioredoxin reductase 2(TXNRD2)                     | -1.109 | 2.621 | Yes |
| Enoyl-CoA delta isomerase 1, mitochondrial (ECI1)   | -1.060 | 2.272 | Yes |
| cytochrome c oxidase subunit 5B(COX5B)              | -1.048 | 1.697 | Yes |

---

**Table S7.** List of 19 proteins with >2-fold change (FC) in HeLa cells treated by high concentration (2  $\mu$ M) of Rotenone (severe toxicity).

| Protein/Gene Name                                   | $\log_2(\text{FC})$ | $-\log_{10}$<br>( <i>P</i> -value) | mitochondrial |
|-----------------------------------------------------|---------------------|------------------------------------|---------------|
| GAR1 ribonucleoprotein(GAR1)                        | 1.902               | 1.614                              | No            |
| histone cluster 2 H3 pseudogene 2(HIST2H3PS2)       | 1.717               | 1.565                              | No            |
| epiplakin 1(EPPK1)                                  | 1.538               | 1.691                              | No            |
| arginine and glutamate rich 1(ARGLU1)               | 1.478               | 1.349                              | Yes           |
| early endosome antigen 1(EEA1)                      | 1.456               | 1.507                              | No            |
| methylcrotonoyl-CoA carboxylase 1(MCCC1)            | 1.355               | 3.791                              | Yes           |
| cysteinyl-tRNA synthetase(CARS)                     | 1.327               | 1.314                              | No            |
| TSR1, ribosome maturation factor(TSR1)              | 1.301               | 1.324                              | No            |
| histone cluster 1 H4 family member i(HIST1H4I)      | 1.287               | 2.115                              | No            |
| S100 calcium binding protein A6(S100A6)             | 1.236               | 2.204                              | No            |
| serine and arginine rich splicing factor 11(SRSF11) | 1.200               | 1.995                              | No            |
| topoisomerase (DNA) I(TOP1)                         | 1.198               | 6.682                              | No            |
| solute carrier family 38 member 2(SLC38A2)          | 1.164               | 2.761                              | No            |
| propionyl-CoA carboxylase beta subunit(PCCB)        | 1.087               | 3.061                              | Yes           |

**Table S8.** List of 7 proteins with <0.5-fold change (FC) in HeLa cells treated by low concentration (0.02  $\mu$ M) of Rotenone (mild stress).

| Protein/Gene Name                                   | $\log_2(\text{FC})$ | $-\log_{10}$<br>( <i>P</i> -value) | mitochondrial |
|-----------------------------------------------------|---------------------|------------------------------------|---------------|
| myoferlin (MYOF)                                    | -2.516              | 2.606                              | No            |
| spastic paraplegia 20 (Troyer syndrome) (SPG20)     | -1.543              | 1.499                              | Yes           |
| histone acetyltransferase 1 (HAT1)                  | -1.249              | 3.218                              | No            |
| histidyl-tRNA synthetase (HARS)                     | -1.226              | 2.581                              | No            |
| La ribonucleoprotein domain family member 4 (LARP4) | -1.118              | 2.935                              | No            |
| SUMO1 activating enzyme subunit 1 (SAE1)            | -1.113              | 2.764                              | No            |
| BUD31 homolog (BUD31)                               | -1.094              | 3.120                              | No            |



**Table S9.** List of 13 proteins with >2-fold change (FC) in HeLa cells treated by low concentration (0.02  $\mu$ M) of Rotenone (mild stress).

| Protein/Gene Name                                                       | $\log_2(\text{FC})$ | $-\log_{10}$<br>( <i>P</i> -value) | mitochondrial |
|-------------------------------------------------------------------------|---------------------|------------------------------------|---------------|
| high mobility group nucleosomal binding domain 2(HMGN2)                 | 2.186               | 1.411                              | No            |
| H3 histone family member 3B(H3F3B)                                      | 1.867               | 1.934                              | No            |
| BCS1 homolog, ubiquinol-cytochrome c reductase complex chaperone(BCS1L) | 1.781               | 2.049                              | Yes           |
| coiled-coil domain containing 51(CCDC51)                                | 1.692               | 1.500                              | Yes           |
| ATPase family, AAA domain containing 3A(ATAD3A)                         | 1.586               | 1.568                              | Yes           |
| zinc metallopeptidase STE24(ZMPSTE24)                                   | 1.390               | 2.383                              | No            |
| mitochondrial carrier 2(MTCH2)                                          | 1.183               | 3.041                              | Yes           |
| calumenin(CALU)                                                         | 1.166               | 3.450                              | No            |
| reticulocalbin 1(RCN1)                                                  | 1.121               | 2.878                              | No            |
| isovaleryl-CoA dehydrogenase(IVD)                                       | 1.119               | 2.669                              | Yes           |
| heat shock protein family E (Hsp10) member 1(HSPE1)                     | 1.105               | 2.514                              | Yes           |
| thioredoxin reductase 1(TXNRD1)                                         | 1.104               | 2.762                              | Yes           |
| pitrilysin metallopeptidase 1(PITRM1)                                   | 1.014               | 3.193                              | Yes           |

## V. Substrate Preparations and Characterizations

### General procedures for substrate preparation

Unless otherwise noted, all reactions of substrates preparation were conducted in flame-dried glassware under a nitrogen atmosphere using anhydrous solvent passed through an activated alumina column (*Innovative Technology*). Commercially available reagents were used without further purification. Thin layer chromatography (TLC) was performed using Jiangyou TLC silica gel plates HSG F<sub>254</sub> and visualized using UV light and potassium permanganate. Flash chromatography was performed on Lisure science EZ purification system using the Santai technologies silica gel cartridge. <sup>1</sup>H and <sup>13</sup>C NMR spectra were recorded on a Bruker AV-400 MHz or an Agilent 500 MHz spectrometer. Chemical shifts in <sup>1</sup>H NMR spectra were reported in parts per million (ppm) on the  $\delta$  scale from an internal standard of residual CDCl<sub>3</sub> (7.26 ppm), CD<sub>3</sub>OD (3.31 ppm) or DMSO-*d*<sub>6</sub> (2.50 ppm). Data for <sup>1</sup>H NMR were reported as follows: chemical shift, multiplicity (s = singlet, d = doublet, t = triplet, q = quartet, dd = doublet of doublets, ddd = doublet of double doublets, m = multiplet, br = broad), coupling constant in Hertz (Hz) and integration. Data for <sup>13</sup>C NMR spectra were reported in terms of chemical shift in ppm from the central peak of CDCl<sub>3</sub> (77.16 ppm), CD<sub>3</sub>OD (49.00 ppm) or DMSO-*d*<sub>6</sub> (39.52 ppm). IR spectra were recorded on a Thermo Scientific Nicolet 380 FT-IR spectrometer. MS experiments were performed on a Bruker maXis 4G instrument for HRMS-ESI.

### Synthesis of D-biotin NHS ester **15a**

This compound was synthesized according to the literature methods.<sup>13</sup>

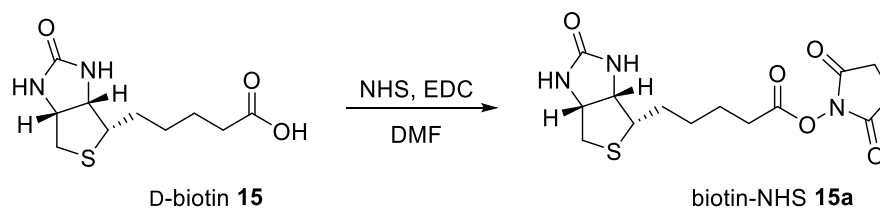

N-hydroxysuccinimide (NHS, 1.38 g, 12.0 mmol) and N-(3-dimethylaminopropyl)-N'-ethylcarbodiimide hydrochloride (EDC, 2.30 g, 12.0 mmol) were added to a solution of D-biotin **15** (2.44 g, 10.0 mmol) in 50 mL DMF. The reaction was stirred at room temperature for 18 h, then concentrated in vacuum. The residue was washed with EtOH/acetic acid/ H<sub>2</sub>O (95: 1: 4) to give **15a** (3.11 g, 95%) as a white solid, which was directly used for the next step. <sup>1</sup>H NMR (500 MHz, DMSO-*d*<sub>6</sub>) δ 6.42 (s, 1H), 6.36 (s, 1H), 4.30 (dd, *J* = 8.0, 5.0 Hz, 1H), 4.15 (ddd, *J* = 7.5, 4.5, 1.5 Hz, 1H), 3.32 (s, 1H), 3.11 (ddd, *J* = 8.5, 6.5, 4.5 Hz, 1H), 2.81 (s, 4H), 2.67 (t, *J* = 7.5 Hz, 2H), 2.58 (d, *J* = 12.0 Hz, 1H), 1.71 – 1.58 (m, 3H), 1.56 – 1.32 (m, 3H); <sup>13</sup>C NMR (126 MHz, DMSO-*d*<sub>6</sub>) δ 170.24, 168.91, 162.65, 60.98, 59.16, 55.22, 39.90, 29.99, 27.82, 27.56, 25.44, 24.30.

### Synthesis of AzPh-biotin probe **1**

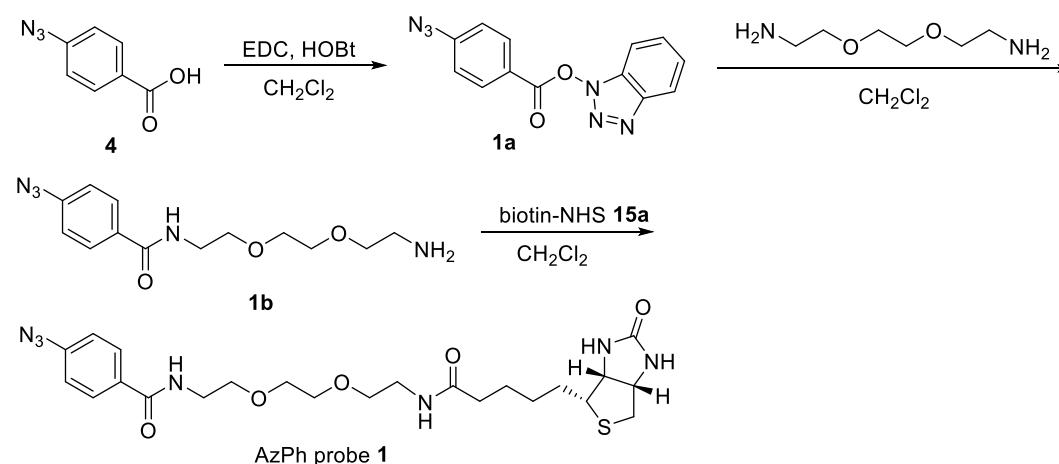

1-Hydroxybenzotriazole (HOBT, 244 mg, 1.80 mmol) and N-(3-dimethylaminopropyl)-N'-ethylcarbodiimide hydrochloride (EDC, 345 mg, 1.80 mmol) were added to a solution of 4-azidobenzoic acid **4** (245 mg, 1.50 mmol) in 20 mL CH<sub>2</sub>Cl<sub>2</sub>. The reaction

was stirred at room temperature for 12 h, then diluted with 10 mL 1 M Na<sub>2</sub>CO<sub>3</sub> aqueous solution. The organic layer was washed with water (20 mL ×3 times) and brine, dried over Na<sub>2</sub>SO<sub>4</sub>, and concentrated in vacuum to give **1a** as a white solid, which was directly used for the next step.

To a solution of 1,8-diamino-3,6-dioxaoctane (1.33 g, 1.32 mL, 9.0 mmol) in 15 mL CH<sub>2</sub>Cl<sub>2</sub>, the 30 mL CH<sub>2</sub>Cl<sub>2</sub> solution of **1a** was added dropwise. The reaction was stirred at room temperature for 24 h, then diluted with 20 mL water and extracted with CH<sub>2</sub>Cl<sub>2</sub> (20 mL ×3 times). The combined organic layer was washed with brine, dried over Na<sub>2</sub>SO<sub>4</sub>, and concentrated in vacuum to give **1b**, which was directly used for the next step.

To a solution of **1b** in 20 mL CHCl<sub>3</sub>, biotin-NHS **15a** (0.49 g, 1.5 mmol) was added. The reaction was stirred at room temperature for 24 h, then concentrated in vacuum. The residue was purified by silica gel column chromatography to give **1** (0.50 g, 64 % for 3 steps) as a light-yellow solid. TLC R<sub>f</sub> = 0.33 (EtOAc/MeOH = 4/1); <sup>1</sup>H NMR (500 MHz, CD<sub>3</sub>OD) δ 7.88 (d, *J* = 8.5 Hz, 2H), 7.15 (d, *J* = 8.5 Hz, 2H), 4.48 (dd, *J* = 8.0, 5.0 Hz, 1H), 4.29 (dd, *J* = 8.0, 4.5 Hz, 1H), 3.70 – 3.61 (m, 6H), 3.58 (t, *J* = 5.5 Hz, 2H), 3.54 (t, *J* = 5.5 Hz, 2H), 3.34 (t, *J* = 5.5 Hz, 2H), 3.19 (ddd, *J* = 9.0, 5.5, 4.5 Hz, 1H), 2.92 (dd, *J* = 13.0, 5.0 Hz, 1H), 2.70 (d, *J* = 13.0 Hz, 1H), 2.68 (s, 1H), 2.19 (t, *J* = 7.5 Hz, 2H), 1.77 – 1.53 (m, 4H), 1.42 (m, 2H); <sup>13</sup>C NMR (126 MHz, CD<sub>3</sub>OD) δ 176.12, 169.23, 166.09, 144.90, 132.13, 130.24, 120.00, 71.34, 71.30, 70.61, 70.58, 63.36, 61.62, 56.99, 41.04, 40.92, 40.28, 36.72, 29.75, 29.49, 26.82; IR (neat): 3278, 2929, 2866, 2124, 1698, 1646, 1544, 1500, 1284, 1126, 850, 764, 669 cm<sup>-1</sup>; HRMS-ESI (*m/z*) [*M*+Na<sup>+</sup>] calcd. for C<sub>23</sub>H<sub>33</sub>N<sub>7</sub>NaO<sub>5</sub>S 542.2156, found 542.2158.

### Synthesis of Phenol-biotin probe **2**

This compound was synthesized according to the literature methods.<sup>8</sup>

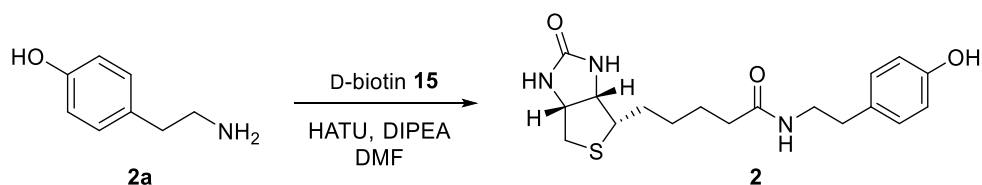

To a solution of D-biotin **15** (0.12 g, 0.50 mmol) and 1-[bis(dimethylamino)methylene]-1H-1,2,3-triazolo[4,5-b]pyridinium-3-oxide hexafluorophosphate (HATU, 0.21 g, 0.55 mmol) in 5 mL DMF, *N,N*-diisopropylethylamine (DIPEA, 0.26 mL, 0.19 g, 1.5 mmol) was added dropwise. After stirred at room temperature for 10 minutes, a solution of 4-(2-aminoethyl)phenol **2a** (68 mg, 0.50 mmol) in 3 mL DMF was added dropwise. The reaction was stirred at room temperature for 12 h, then diluted with 20 mL water and 30 mL 1-butanol. The organic layer was collected and washed with water (20 mL  $\times$  3 times) and brine, dried over Na<sub>2</sub>SO<sub>4</sub>, and concentrated in vacuum. The residue was purified by silica gel column chromatography to give **2** (0.11 g, 62%) as a light-yellow solid. <sup>1</sup>H NMR (500 MHz, CD<sub>3</sub>OD)  $\delta$  7.93 (t, *J* = 5.9 Hz, 1H), 7.03 (d, *J* = 8.4 Hz, 2H), 6.70 (d, *J* = 8.4 Hz, 2H), 4.49 (dd, *J* = 7.9, 4.8 Hz, 1H), 4.27 (dd, *J* = 7.9, 4.4 Hz, 1H), 3.36 (m, 2H), 3.16 (ddd, *J* = 8.9, 5.8, 4.4 Hz, 1H), 2.93 (dd, *J* = 12.7, 5.0 Hz, 1H), 2.74 – 2.66 (m, 3H), 2.15 (t, *J* = 7.5 Hz, 2H), 1.76 – 1.50 (m, 4H), 1.42 – 1.27 (m, 2H); <sup>13</sup>C NMR (126 MHz, CD<sub>3</sub>OD)  $\delta$  176.05, 166.08, 156.85, 131.22, 130.75, 116.19, 63.33, 61.61, 56.94, 42.20, 41.04, 36.84, 35.63, 29.65, 29.45, 26.92.

### Synthesis of AcPh-biotin probe **3**

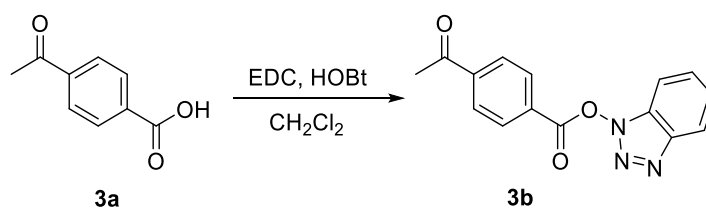

1-Hydroxybenzotriazole (HOBt, 649 mg, 4.80 mmol) and *N*-(3-dimethylaminopropyl)-*N'*-ethylcarbodiimide hydrochloride (EDC, 920 mg, 4.80 mmol) were added to a solution of 4-acetylbenzoic acid **3a** (657 mg, 4.00 mmol) in 20 mL CH<sub>2</sub>Cl<sub>2</sub>. The reaction was stirred at room temperature for 12 h, then diluted with 10 mL 1 M Na<sub>2</sub>CO<sub>3</sub> aqueous solution. The organic layer was washed with water (20 mL  $\times$  2 times) and brine, dried over Na<sub>2</sub>SO<sub>4</sub>, and concentrated in vacuum to give **3b** (1.08 g, 96%) as a white solid. <sup>1</sup>H NMR (400 MHz, CDCl<sub>3</sub>)  $\delta$  8.40 (d, *J* = 8.2 Hz, 2H), 8.17 (d, *J* = 8.2 Hz, 2H), 8.13 (d,

$J = 8.4$  Hz, 1H), 7.59 (dd,  $J = 8.4, 6.8$  Hz, 1H), 7.51 – 7.44 (m, 2H), 2.72 (s, 3H);  $^{13}\text{C}$  NMR (101 MHz,  $\text{CDCl}_3$ )  $\delta$  197.09, 162.22, 143.69, 142.20, 131.22, 129.12, 128.95, 128.81, 128.54, 125.16, 120.83, 108.38, 27.15.

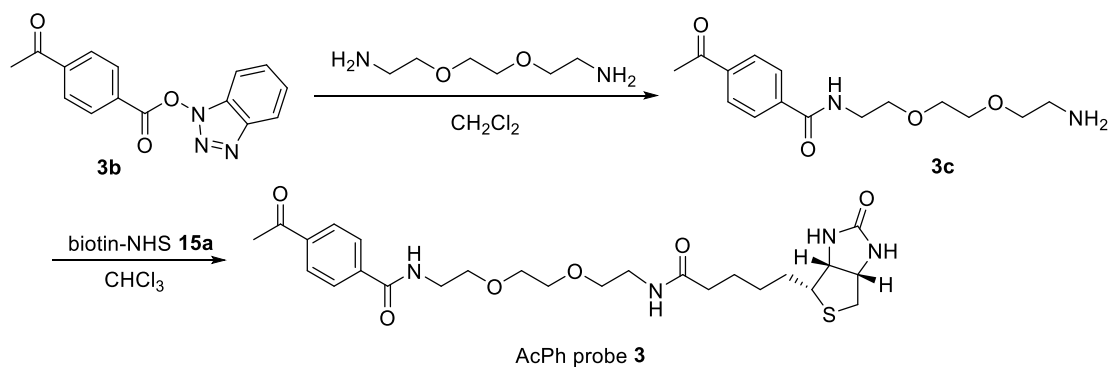

To a solution of 1,8-diamino-3,6-dioxaoctane (1.33 g, 1.31 mL, 9.0 mmol) in 15 mL  $\text{CH}_2\text{Cl}_2$ , 30 mL  $\text{CH}_2\text{Cl}_2$  solution of **3b** (0.42 g, 1.5 mmol) was added dropwise. The reaction was stirred at room temperature for 12 h, then diluted with 20 mL water and extracted with  $\text{CH}_2\text{Cl}_2$  (20 mL  $\times$  3 times). The combined organic layer was washed with brine, dried over  $\text{Na}_2\text{SO}_4$ , and concentrated in vacuum to give **3c** as a light-yellow oil, which was directly used for the next step.

To a solution of **3c** in 20 mL  $\text{CHCl}_3$ , biotin-NHS **15a** (0.49 g, 1.5 mmol) was added. The reaction was stirred at room temperature for 24 h, then concentrated in vacuum. The residue was purified by silica gel column chromatography to give **3** (0.36 g, 46 % for 2 steps) as a white solid. TLC  $R_f = 0.50$  (EtOAc/MeOH = 4/1).  $^1\text{H}$  NMR (500 MHz,  $\text{DMSO}-d_6$ )  $\delta$  8.70 (t,  $J = 5.5$  Hz, 1H), 8.03 (d,  $J = 8.5$  Hz, 2H), 7.96 (d,  $J = 8.5$  Hz, 2H), 7.81 (t,  $J = 5.5$  Hz, 1H), 6.41 (s, 1H), 6.35 (s, 1H), 4.30 (dd,  $J = 7.5, 5.0$  Hz, 1H), 4.12 (ddd,  $J = 7.5, 4.5, 2.0$  Hz, 1H), 3.58 – 3.49 (m, 6H), 3.44 (q,  $J = 6.0$  Hz, 2H), 3.39 (t,  $J = 6.0$  Hz, 2H), 3.17 (q,  $J = 6.0$  Hz, 2H), 3.08 (ddd,  $J = 8.5, 6.0, 4.5$  Hz, 1H), 2.81 (dd,  $J = 12.5, 5.0$  Hz, 1H), 2.62 (s, 3H), 2.57 (d,  $J = 12.5$  Hz, 1H), 2.05 (t,  $J = 7.5$  Hz, 2H), 1.59 (m, 1H), 1.47 (m, 3H), 1.29 (m, 2H);  $^{13}\text{C}$  NMR (126 MHz,  $\text{DMSO}-d_6$ )  $\delta$  197.68, 172.10, 165.50, 162.67, 138.56, 138.16, 128.12, 127.49, 69.56, 69.53, 69.15, 68.77, 61.02, 59.18, 55.40, 39.30, 38.42, 35.08, 28.17, 28.02, 26.95, 25.24, 25.22; IR (neat): 3276, 2921, 2859, 1687, 1647, 1543, 1456, 1266, 1096, 767, 669  $\text{cm}^{-1}$ ; HRMS-ESI (m/z)  $[\text{M}+\text{Na}^+]$  calcd. for  $\text{C}_{25}\text{H}_{36}\text{N}_4\text{NaO}_6\text{S}$  543.2248, found 543.2249.

### Synthesis of methyl 4-azidobenzoate **5**

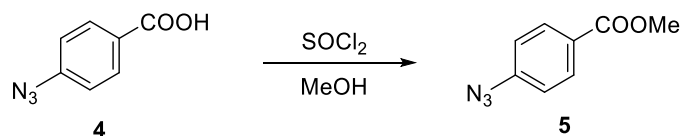

To a solution of 4-azidobenzoic acid **4** (1.30 g, 8.0 mmol) in methanol (40 mL),  $\text{SOCl}_2$  (1.43 g, 0.87 mL, 12.0 mmol) was added dropwise at 0 °C. The reaction was stirred at rt for 24 h, then concentrated in vacuum. The residue was purified by silica gel column chromatography to give **5** (1.07 g, 75%) as a light-yellow solid.  $^1\text{H}$  NMR (500 MHz,  $\text{CDCl}_3$ )  $\delta$  8.03 (d,  $J = 8.7$  Hz, 2H), 7.06 (d,  $J = 8.7$  Hz, 2H), 3.91 (s, 3H);  $^{13}\text{C}$  NMR (126 MHz,  $\text{CDCl}_3$ )  $\delta$  166.43, 144.89, 131.55, 126.84, 118.98, 52.30.

### Mechanistic studies of the photolabeling intermediates

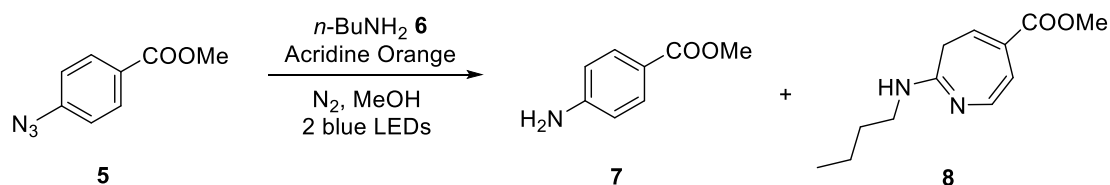

A solution of **5** (18 mg, 0.10 mmol) and Acridine Orange (6.6 mg, 0.020 mmol) in methanol (2.0 mL) was placed in a 5.0 mL clear-colored glass vial equipped with a magnetic stir bar. After the addition of *n*-butylamine **6** (0.49 mL, 5 mmol), the reaction was bubbled with nitrogen gas to remove the oxygen. Then the vial was sealed and exposed to  $2 \times 4\text{W}$  468 nm blue LEDs (10.0 cm from the LEDs,  $10.4 \text{ mW cm}^{-2}$ ) with stirring at ambient temperature for 48 hours, then concentrated in vacuum. The residue was purified by silica gel column chromatography to give **8** as a brown liquid (14 mg, 63%). Another isolated product was identified as 4-methoxycarbonyl aniline **7**.

For **7**: TLC  $R_f = 0.46$  (petroleum ether/ethyl acetate = 2/1);  $^1\text{H}$  NMR (500 MHz,  $\text{CDCl}_3$ )  $\delta$  7.85 (d,  $J = 8.7$  Hz, 2H), 6.64 (d,  $J = 8.7$  Hz, 2H), 4.05 (br, 2H), 3.85 (s, 3H);  $^{13}\text{C}$  NMR (126 MHz,  $\text{CDCl}_3$ )  $\delta$  167.29, 150.91, 131.74, 119.93, 113.95, 51.75.

For **8**: TLC  $R_f = 0.26$  (petroleum ether/ethyl acetate = 1/2);  $^1\text{H}$  NMR (500 MHz,  $\text{CDCl}_3$ )  $\delta$  7.17 (d,  $J = 8.3$  Hz, 1H), 6.22 (d,  $J = 8.3$  Hz, 1H), 6.19 (t,  $J = 7.4$  Hz, 1H), 4.35 (s,

1H), 3.77 (s, 3H), 3.26 (t,  $J = 7.3$  Hz, 2H), 2.71 (d,  $J = 7.4$  Hz, 2H), 1.48 (tt,  $J = 7.5$ , 7.3 Hz, 2H), 1.33 (tq,  $J = 7.5$ , 7.3 Hz, 2H), 0.90 (t,  $J = 7.3$  Hz, 3H).  $^{13}\text{C}$  NMR (126 MHz,  $\text{CDCl}_3$ )  $\delta$  167.43, 145.92, 142.19, 131.68, 122.90, 108.23, 51.93, 42.13, 36.16, 31.16, 20.12, 13.77. IR (neat): 3381, 3255, 2956, 2932, 2872, 1720, 1588, 1530, 1434, 1378, 1323, 1264, 1193, 1069, 760  $\text{cm}^{-1}$ . HRMS-ESI ( $m/z$ ) [ $\text{M}+\text{H}^+$ ] calcd. for  $\text{C}_{12}\text{H}_{18}\text{N}_2\text{O}_2$  223.1441, found 223.1445.

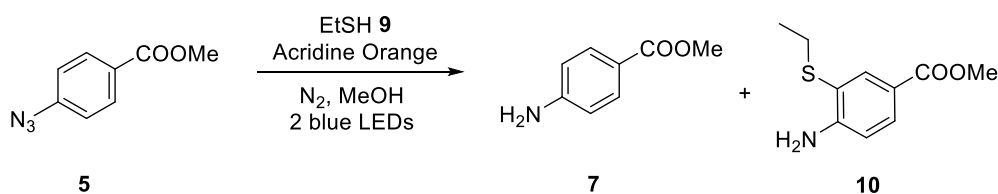

A solution of **5** (18 mg, 0.10 mmol) and Acridine Orange (6.6 mg, 0.020 mmol) in methanol (2.0 mL) was placed in a 5.0 mL clear-colored glass vial equipped with a magnetic stir bar. After the addition of ethanethiol **9** (0.37 mL, 5 mmol), the reaction was bubbled with nitrogen gas to remove the oxygen. Then the vial was sealed and exposed to  $2 \times 4\text{W}$  468 nm blue LEDs (10.0 cm from the LEDs,  $10.4 \text{ mW cm}^{-2}$ ) with stirring at ambient temperature for 48 hours, then concentrated in vacuum. The residue was purified by silica gel column chromatography to give **10** as a white solid (3.0 mg, 14%). Another isolated product was identified as 4-methoxycarbonyl aniline **7**.

For **10**: TLC  $R_f = 0.55$  (petroleum ether/ethyl acetate = 4/1);  $^1\text{H}$  NMR (500 MHz,  $\text{CDCl}_3$ )  $\delta$  8.08 (d,  $J = 2.0$  Hz, 1H), 7.79 (dd,  $J = 8.4$ , 2.0 Hz, 1H), 6.69 (d,  $J = 8.4$  Hz, 1H), 4.78 (s, 2H), 3.86 (s, 3H), 2.77 (q,  $J = 7.3$  Hz, 2H), 1.23 (t,  $J = 7.3$  Hz, 3H);  $^{13}\text{C}$  NMR (126 MHz,  $\text{CDCl}_3$ )  $\delta$  166.77, 152.24, 137.91, 131.44, 119.76, 117.01, 113.57, 51.73, 29.01, 14.88. IR (neat): 3462, 3353, 2950, 2923, 1707, 1609, 1497, 1434, 1254, 1121, 765, 750  $\text{cm}^{-1}$ . HRMS-ESI ( $m/z$ ) [ $\text{M}+\text{H}^+$ ] calcd. for  $\text{C}_{10}\text{H}_{13}\text{NO}_2\text{S}$  212.0740, found 212.0742.



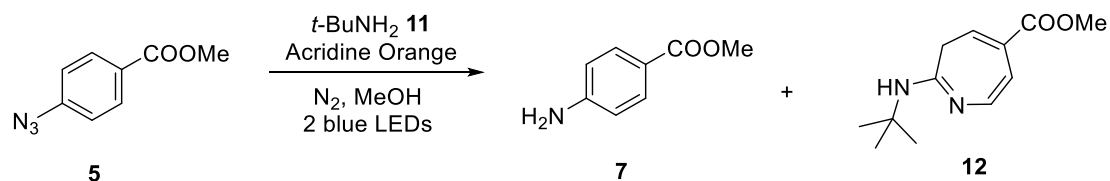

A solution of **5** (18 mg, 0.10 mmol) and Acridine Orange (6.6 mg, 0.020 mmol) in methanol (2.0 mL) was placed in a 5.0 mL clear-colored glass vial equipped with a magnetic stir bar. After the addition of *tert*-butylamine **11** (0.53 mL, 5 mmol), the reaction was bubbled with nitrogen gas to remove the oxygen. Then the vial was sealed and exposed to  $2 \times 4\text{W}$  468 nm blue LEDs (10.0 cm from the LEDs,  $10.4 \text{ mW cm}^{-2}$ ) with stirring at ambient temperature for 48 hours, then concentrated in vacuum. The residue was purified by silica gel column chromatography to give **12** as a yellow solid (12 mg, 54%). Another isolated product was identified as 4-methoxycarbonyl aniline **7**. For **12**: TLC  $R_f = 0.43$  (petroleum ether/ethyl acetate = 2/1);  $^1\text{H NMR}$  (500 MHz,  $\text{CDCl}_3$ )  $\delta$  7.16 (dd,  $J = 8.2, 0.7$  Hz, 1H), 6.19 (dd,  $J = 8.2, 1.2$  Hz, 1H), 6.13 (tt,  $J = 7.5, 0.9$  Hz, 1H), 4.19 (s, 1H), 3.78 (s, 3H), 2.61 (d,  $J = 7.5$  Hz, 2H), 1.30 (s, 9H).  $^{13}\text{C NMR}$  (126 MHz,  $\text{CDCl}_3$ )  $\delta$  167.73, 142.49, 141.93, 131.27, 122.16, 107.25, 62.27, 51.89, 37.66, 28.89. IR (neat): 3385, 2963, 1704, 1590, 1521, 1452, 1434, 1361, 1263, 1221, 1191, 1119, 1080, 1053,  $759 \text{ cm}^{-1}$ . HRMS-ESI ( $m/z$ ) [ $\text{M}+\text{H}^+$ ] calcd. for  $\text{C}_{12}\text{H}_{18}\text{N}_2\text{O}_2$  223.1441, found 223.1444.

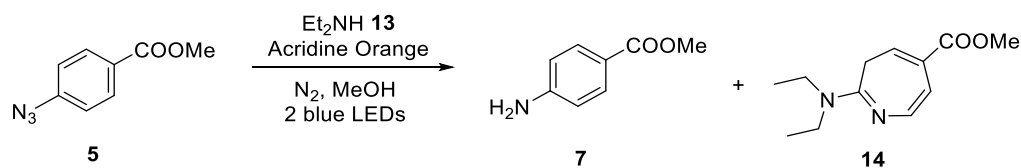

A solution of **5** (70 mg, 0.40 mmol) and Acridine Orange (26 mg, 0.080 mmol) in methanol (9 mL) was placed in a 16 mL clear-colored glass vial equipped with a magnetic stir bar. After the addition of diethylamine **13** (1.0 mL, 20 mmol), the reaction was bubbled with nitrogen gas to remove the oxygen. Then the vial was sealed and exposed to  $2 \times 4\text{W}$  468 nm blue LEDs (10.0 cm from the LEDs,  $10.4 \text{ mW cm}^{-2}$ ) with stirring at ambient temperature for 40 hours, then concentrated in vacuum. The residue was purified by silica gel column chromatography to give **14** as a yellow solid (18 mg, 40%)<sup>14-15</sup>. Another isolated product was identified as the 4-methoxycarbonyl aniline **7**.

For **14**: TLC  $R_f = 0.38$  (petroleum ether/ethyl acetate = 2/1);  $^1\text{H}$  NMR (500 MHz,  $\text{CDCl}_3$ )  $\delta$  7.20 (d,  $J = 8.0$  Hz, 1H), 6.21 (dd,  $J = 8.0, 1.3$  Hz, 1H), 6.10 (t,  $J = 7.7$  Hz, 1H), 3.77 (s, 3H), 3.37 (d,  $J = 6.8$  Hz, 4H), 1.15 (br, 6H);  $^{13}\text{C}$  NMR (126 MHz,  $\text{CDCl}_3$ )  $\delta$  167.82, 144.85, 142.05, 132.30, 119.24, 106.93, 51.99, 43.51, 31.80, 13.74; HRMS-ESI ( $m/z$ )  $[\text{M}+\text{H}^+]$  calcd. for  $\text{C}_{12}\text{H}_{19}\text{N}_2\text{O}_2$  223.1441, found 223.1445.<sup>14-15</sup>

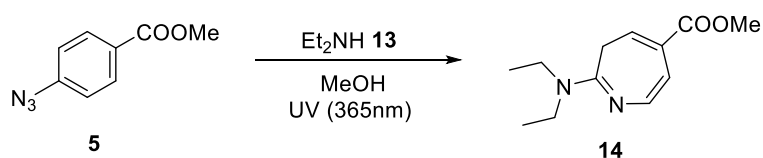

A solution of **5** (18 mg, 0.10 mmol) and diethylamine **13** (0.5 mL, 5 mmol) in methanol (1.5 mL) was placed in a 5.0 mL clear-colored glass vial equipped with a magnetic stir bar. The reaction was exposed to ultraviolet light (15.0 cm from the smart xenon lamp light source equipped with band-pass filters,  $19.8 \text{ mW cm}^{-2}$ ) with stirring at ambient temperature for 12 hours, then concentrated in vacuum. The residue was purified by silica gel column chromatography to give **14** as a yellow solid (2.4 mg, 11%). The TLC and  $^1\text{H}$  NMR analysis indicated that compound **14** obtained from UV-light induced conditions were identical from the photocatalytic conditions.

## VI. NMR Spectra of New Compounds

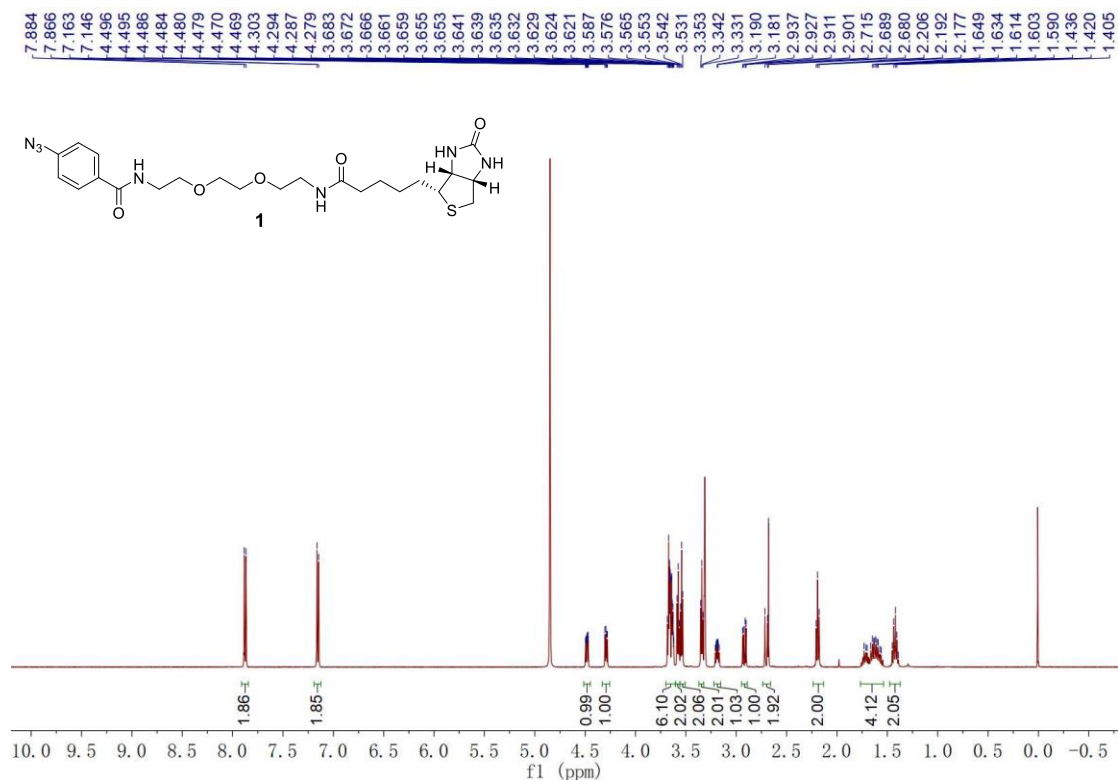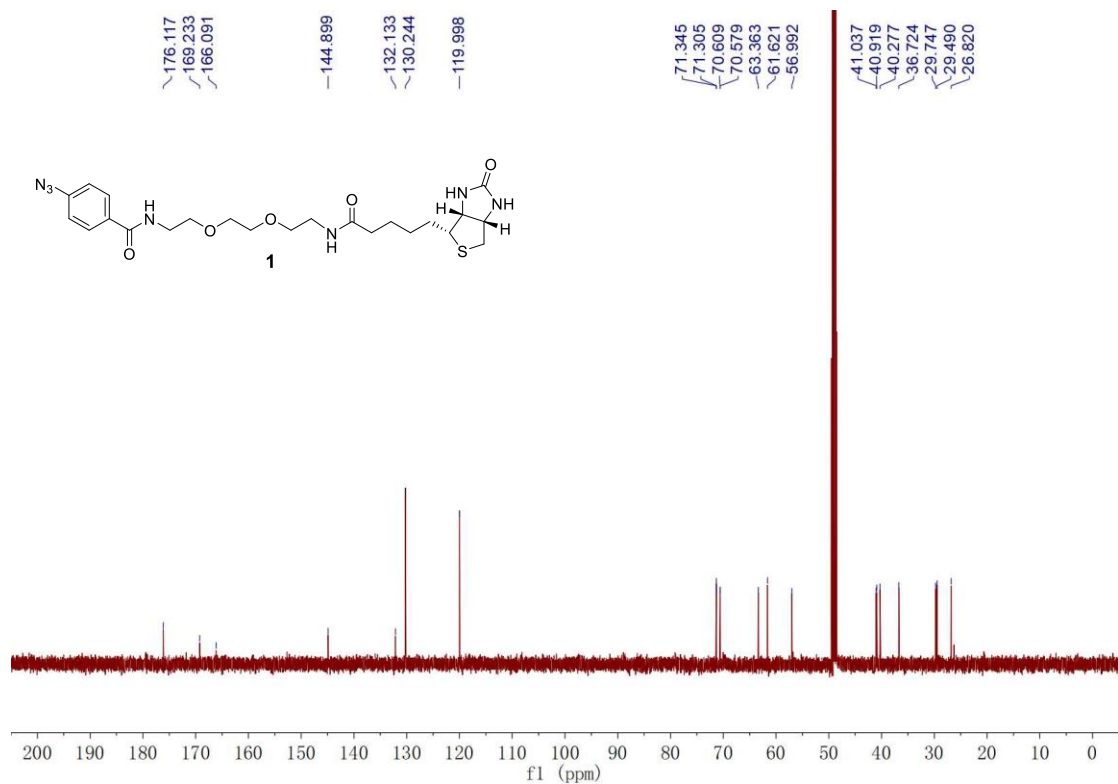

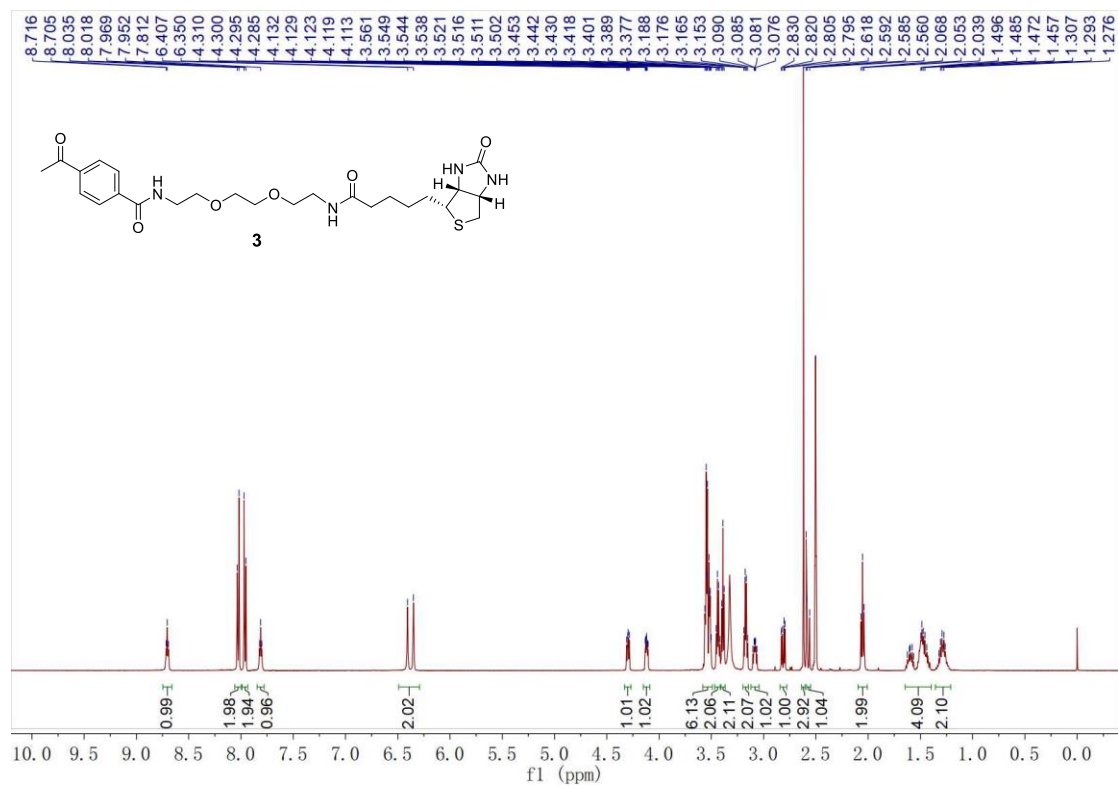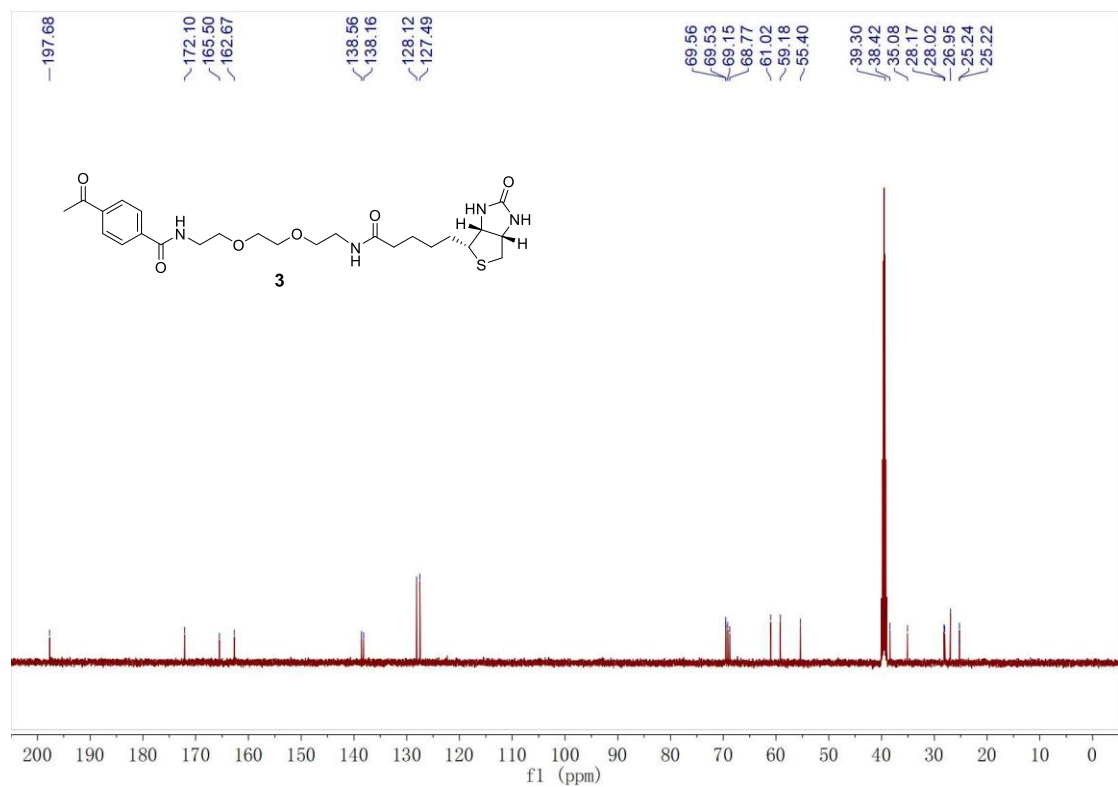

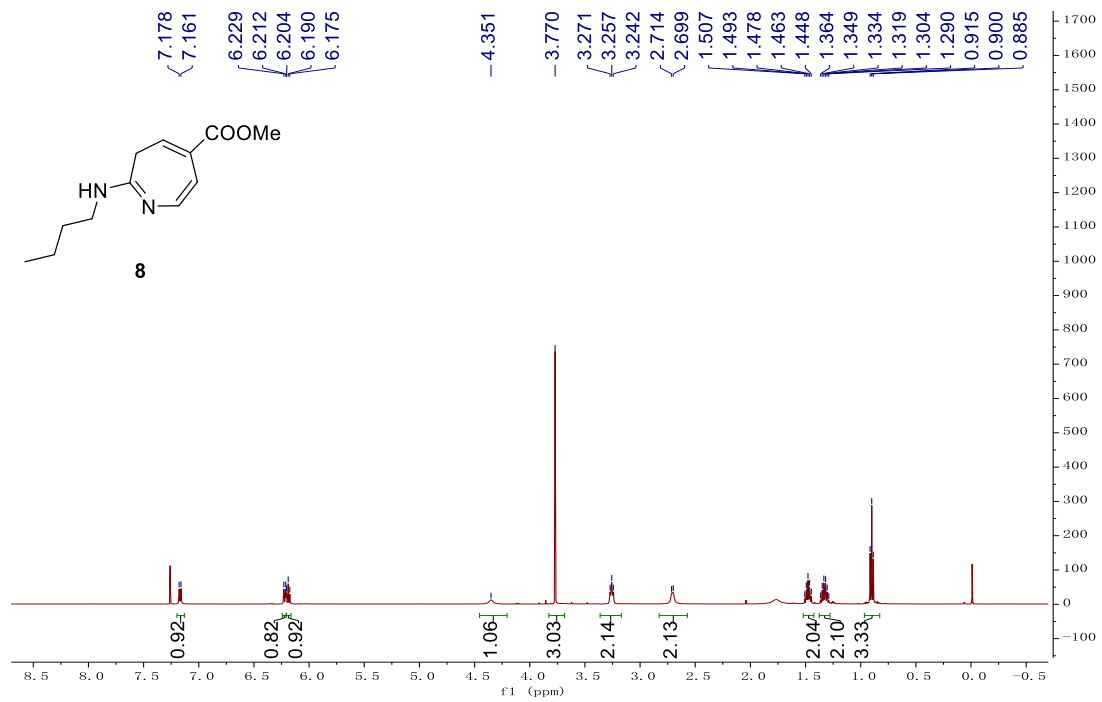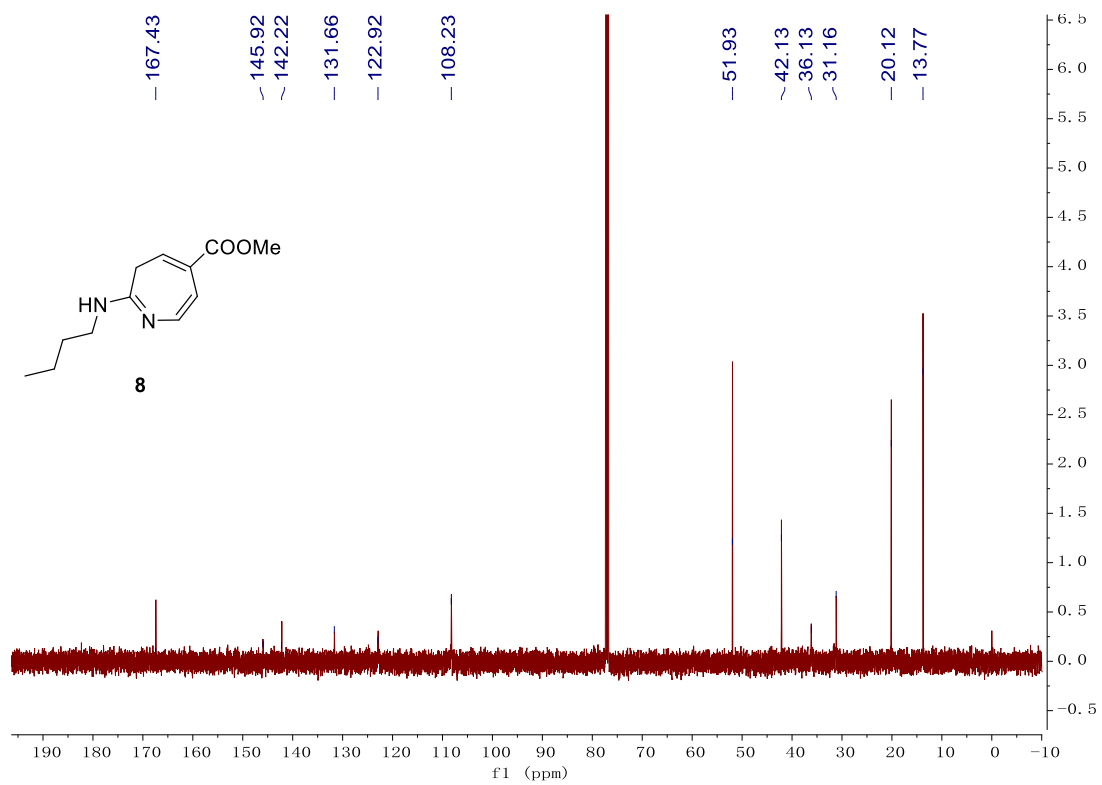

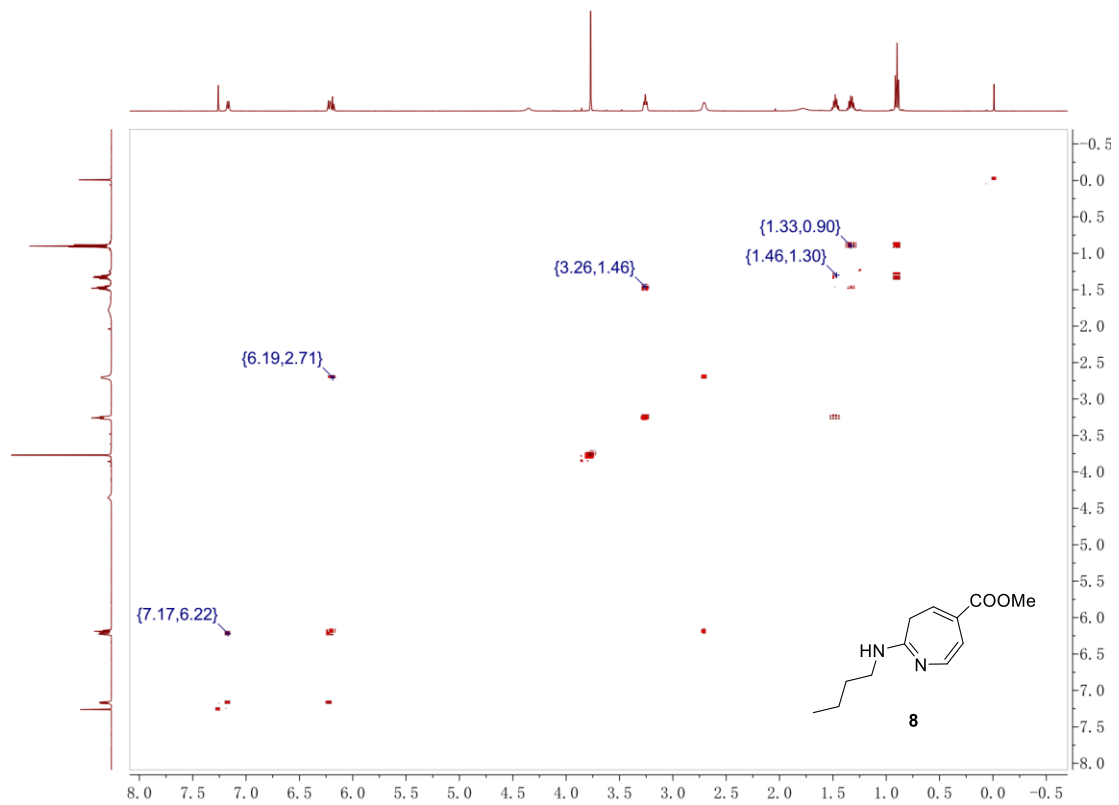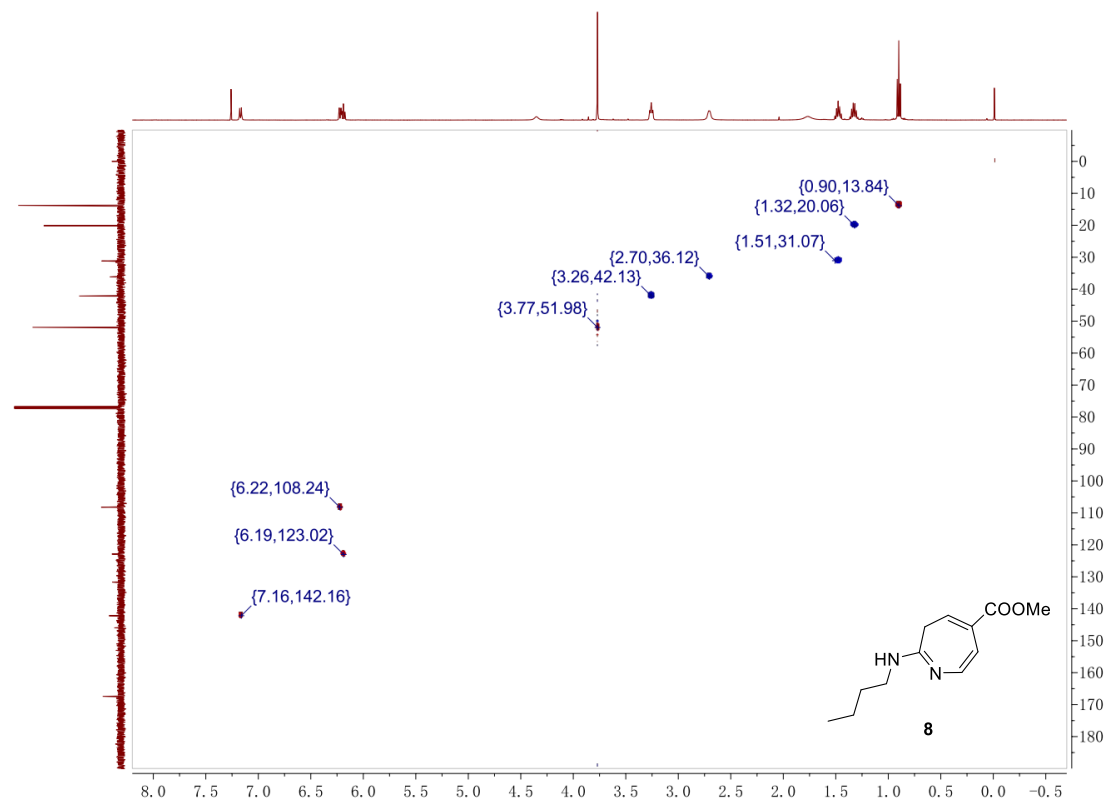

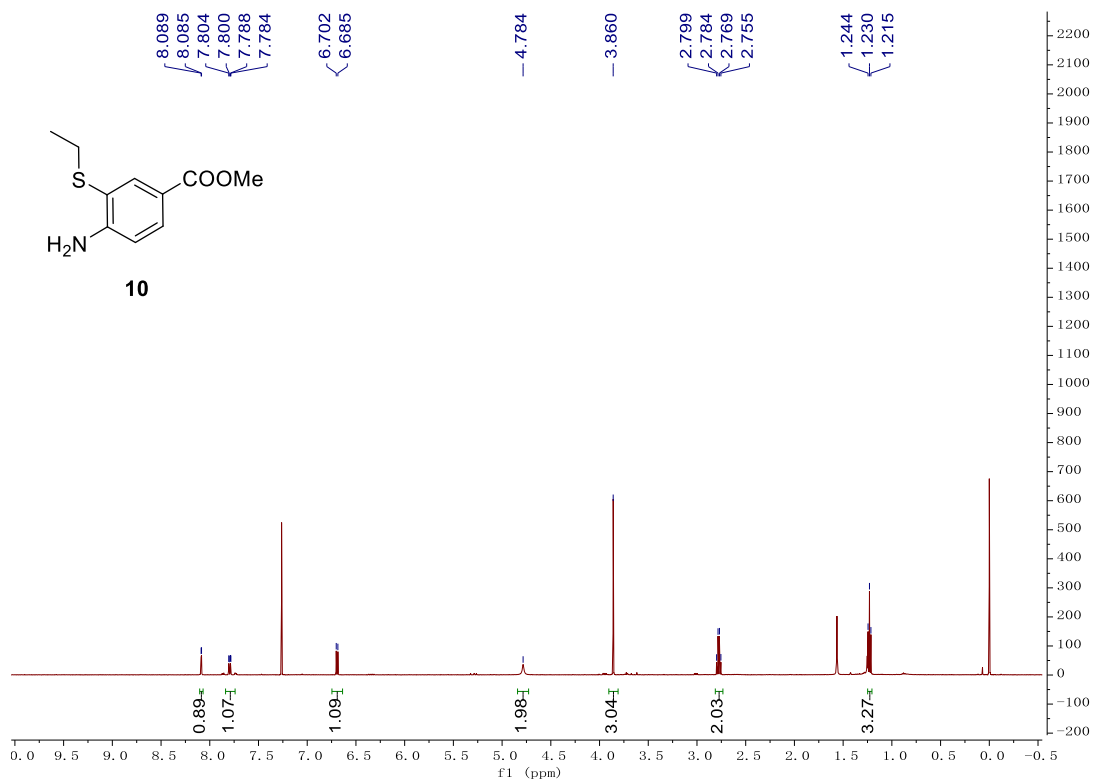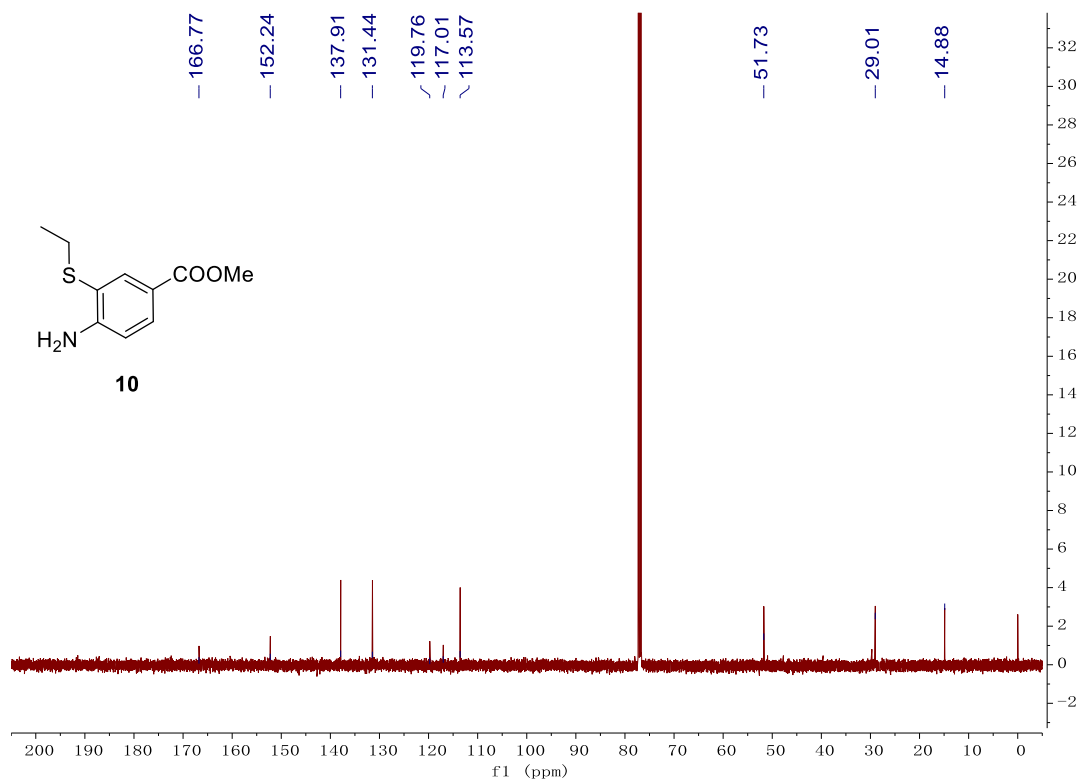

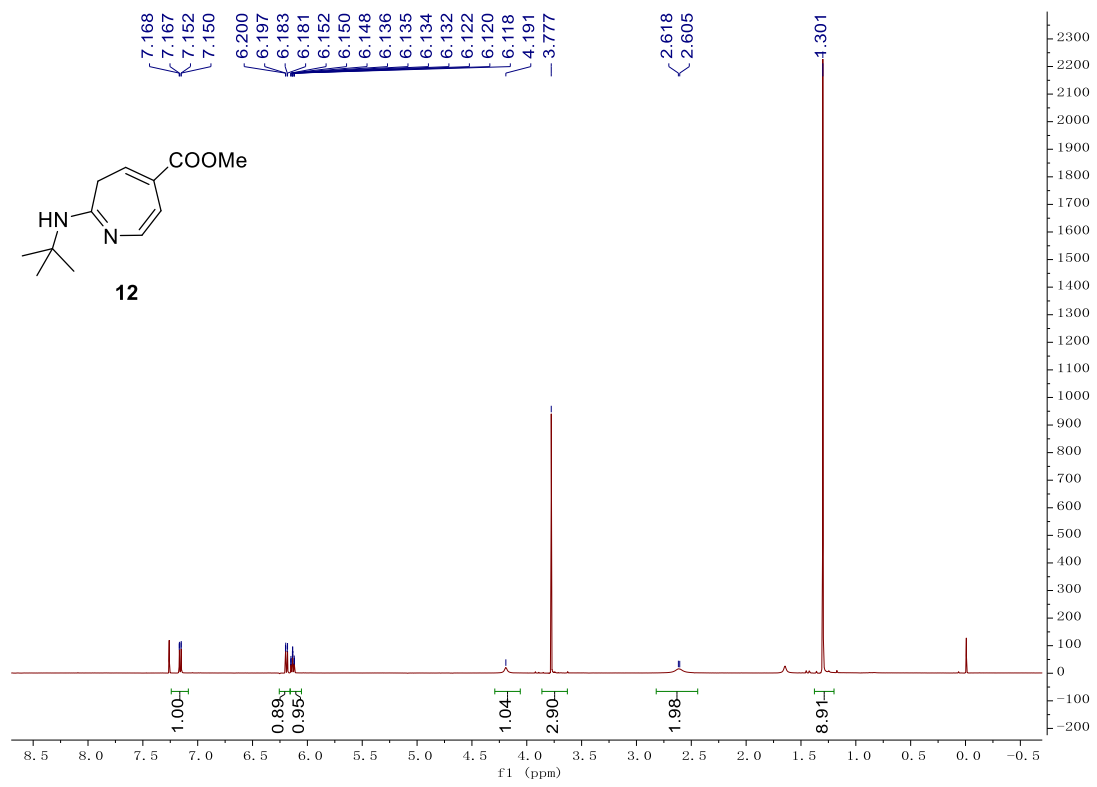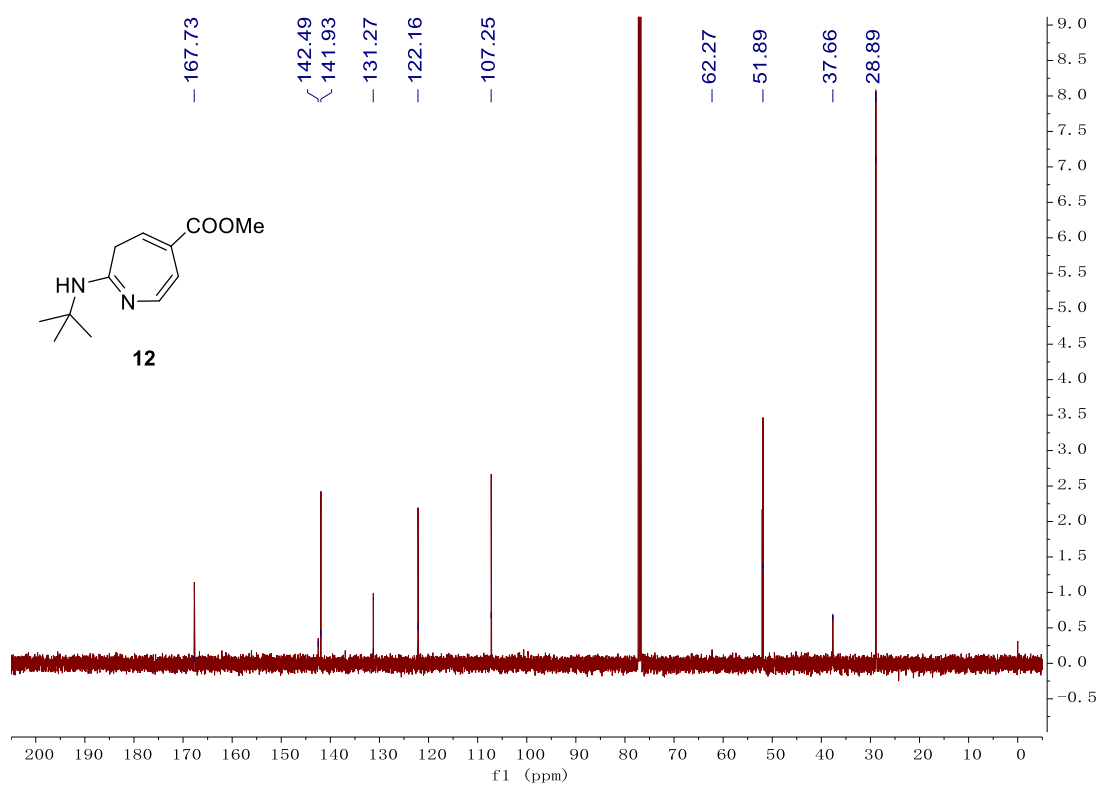



## VII. References

1. Pfiffi, D.; Bier, B. A.; Marian, C. M.; Schaper, K.; Seidel, C. A., Diphenylhexatrienes as photoprotective agents for ultrasensitive fluorescence detection. *J. Phys. Chem. A* **2010**, *114* (12), 4099-108.
2. Romero, N. A.; Nicewicz, D. A., Organic Photoredox Catalysis. *Chem. Rev.* **2016**, *116* (17), 10075-166.
3. Wilkinson, F.; Helman, W. P.; Ross, A. B., Quantum Yields for the Photosensitized Formation of the Lowest Electronically Excited Singlet-State of Molecular-Oxygen in Solution. *J. Phys. Chem. Ref. Data* **1993**, *22* (1), 113-262.
4. Gandin, E.; Lion, Y.; Van de Vorst, A., Quantum Yield of Singlet Oxygen Production by Xanthene Derivatives. *Photochem. Photobio.* **1983**, *37* (3), 271-278.
5. Ezquerria Riega, S. D.; Rodriguez, H. B.; San Roman, E., Rose bengal in poly(2-hydroxyethyl methacrylate) thin films: self-quenching by photoactive energy traps. *Methods Appl. Fluoresc.* **2017**, *5* (1), 014010.
6. Kim, M.; Ko, S.-K.; Kim, H.; Shin, I.; Tae, J., Rhodamine cyclic hydrazide as a fluorescent probe for the detection of hydroxyl radicals. *Chem. Commun.* **2013**, *49* (72), 7959-7961.
7. Kim, S.; Tachikawa, T.; Fujitsuka, M.; Majima, T., Far-Red Fluorescence Probe for Monitoring Singlet Oxygen during Photodynamic Therapy. *J. Am. Chem. Soc.* **2014**, *136* (33), 11707-11715.
8. Rhee, H. W.; Zou, P.; Udeshi, N. D.; Martell, J. D.; Mootha, V. K.; Carr, S. A.; Ting, A. Y., Proteomic mapping of mitochondria in living cells via spatially restricted enzymatic tagging. *Science* **2013**, *339* (6125), 1328-1331.
9. Beausoleil, S. A.; Villén, J.; Gerber, S. A.; Rush, J.; Gygi, S. P., A probability-based approach for high-throughput protein phosphorylation analysis and site localization. *Nat. Biotechnol.* **2006**, *24* (10), 1285-1292.
10. Huang da, W.; Sherman, B. T.; Lempicki, R. A., Systematic and integrative analysis of large gene lists using DAVID bioinformatics resources. *Nat. Protoc.* **2009**, *4* (1), 44-57.
11. The UniProt, C., UniProt: a worldwide hub of protein knowledge. *Nucleic Acids Res.* **2018**, *47* (D1), D506-D515.
12. Calvo, S. E.; Clauser, K. R.; Mootha, V. K., MitoCarta2.0: an updated inventory of mammalian mitochondrial proteins. *Nucleic Acids Res.* **2015**, *44* (D1), D1251-D1257.
13. Shi, H.; Liu, K.; Xu, A.; Yao, S. Q., Small molecule microarray-facilitated screening of affinity-based probes (AfBPs) for gamma-secretase. *Chem. Commun.* **2009**, (33), 5030-2.
14. Nielsen, P. E.; Buchardt, O., Aryl Azides as Photoaffinity Labels. A Photochemical Study of Some 4-Substituted Aryl Azides. *Photochem. Photobiol.* **1982**, *35* (3), 317-323.
15. Li, Y. Z.; Kirby, J. P.; George, M. W.; Poliakoff, M.; Schuster, G. B., 1,2-Didehydroazepines from the photolysis of substituted aryl azides: analysis of their chemical and physical properties by time-resolved spectroscopic methods. *J. Am. Chem. Soc.* **1988**, *110* (24), 8092-8098.
